# Supplementary material for: MICU2 up-regulation enhances tumor aggressiveness and metabolic reprogramming during colorectal cancer development
Source: PubMed Central journal article supplement (PMC11542858; doi:10.1371/journal.pbio.3002854), 2024-10-28
Supplement: pbio.3002854.s014.pdf [file pbio.3002854.s014.pdf]

Colon lines  
Figure 1C

# MICU1 ( $\approx 50 / 55\text{kDa}$ )

01\_04\_23

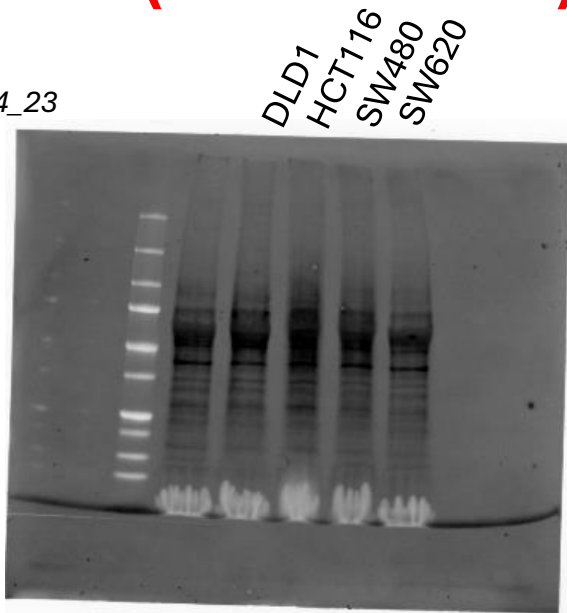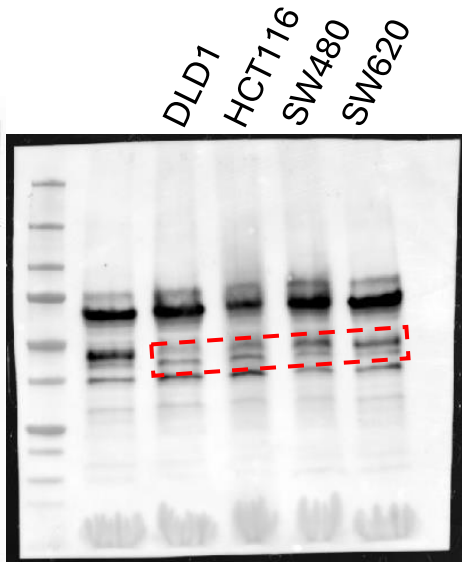

06\_04\_23

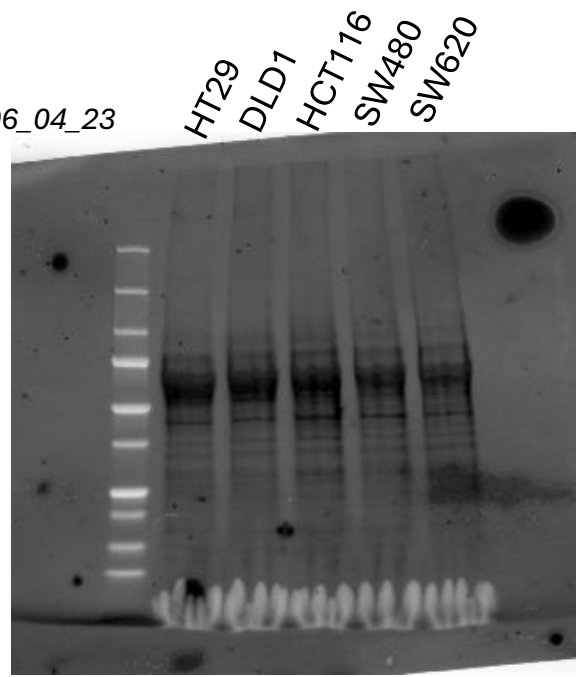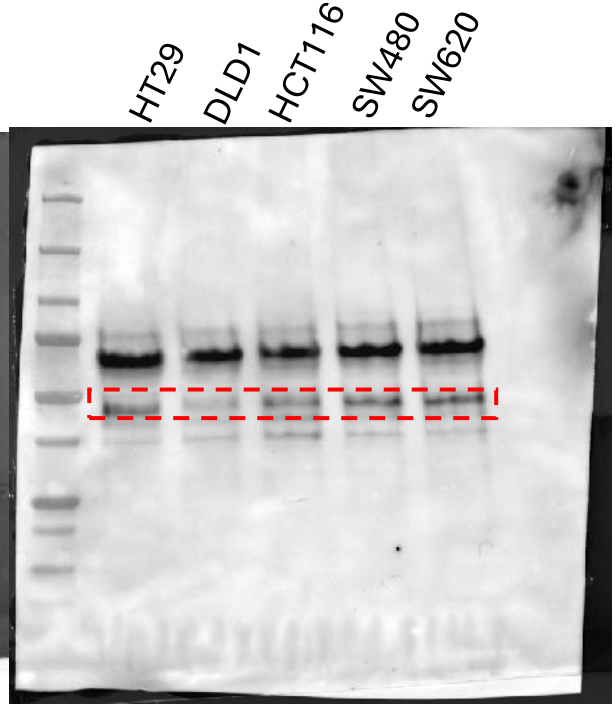

28\_04\_23

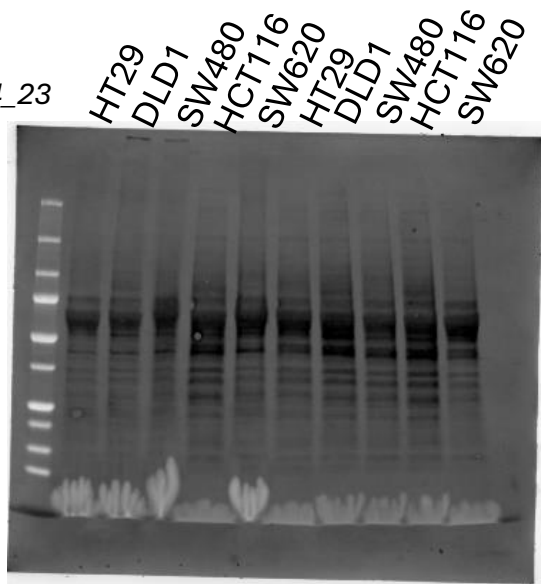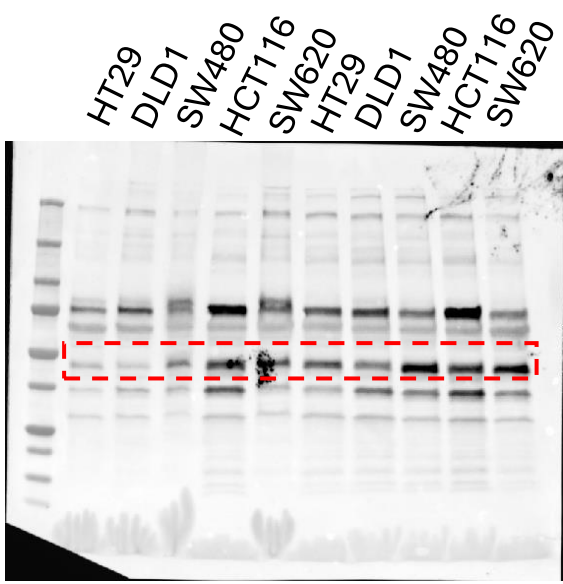

06\_05\_23

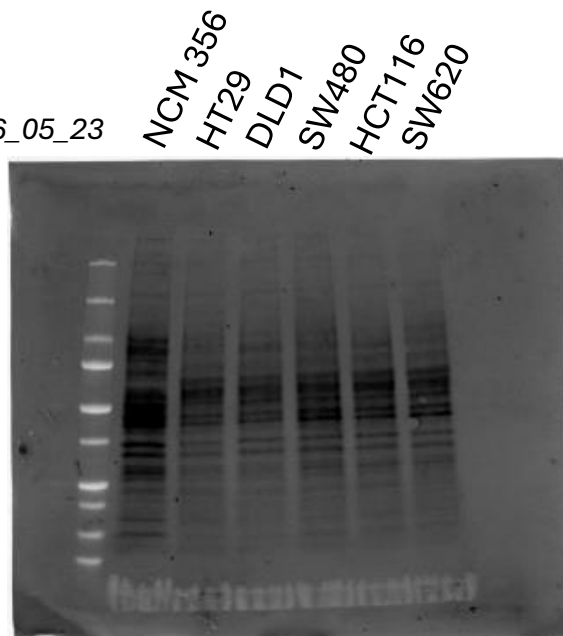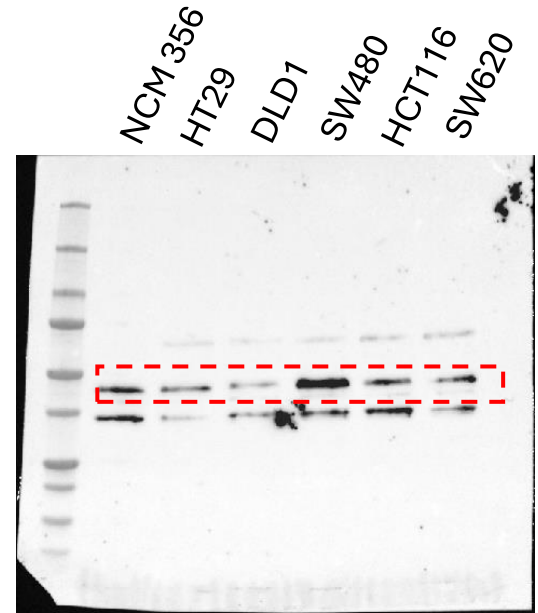

# MICU1 ( $\approx 50 / 55$ kDa)

24\_05\_23

NCM 356  
NCM 356  
HT29  
DLD1  
SW480  
HCT116  
SW620

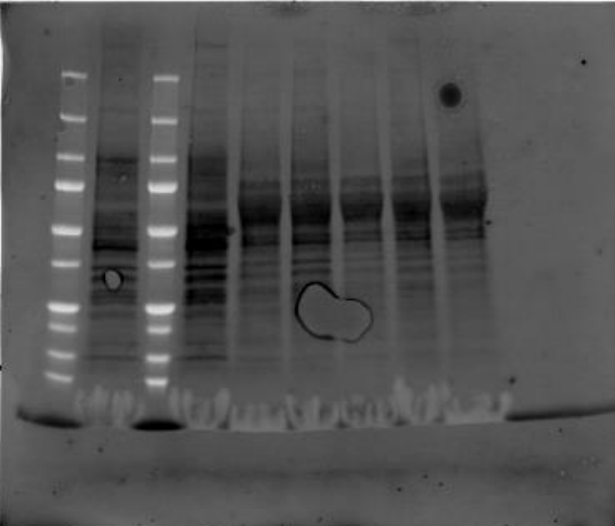

NCM 356  
NCM 356  
HT29  
DLD1  
SW480  
HCT116  
SW620

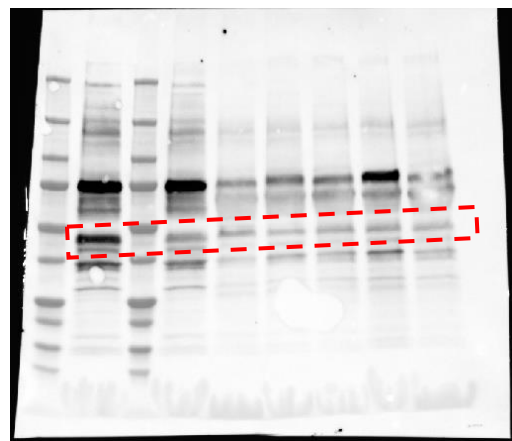

26\_05\_23

NCM 356  
HT29  
DLD1  
SW480  
HCT116  
SW620

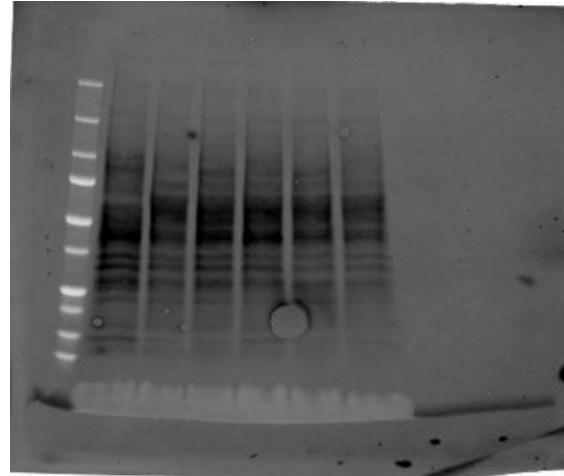

NCM 356  
HT29  
DLD1  
SW480  
HCT116  
SW620

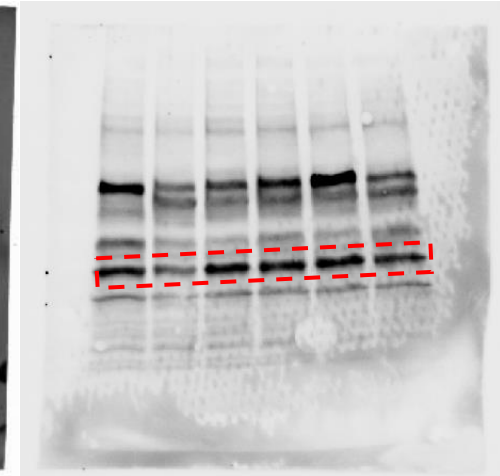

14\_06\_23 NCM 356

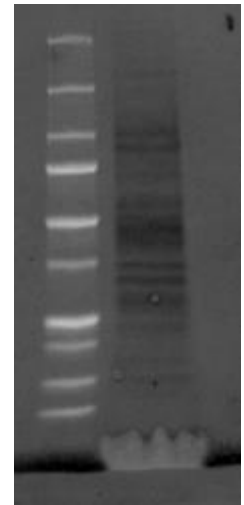

NCM 356

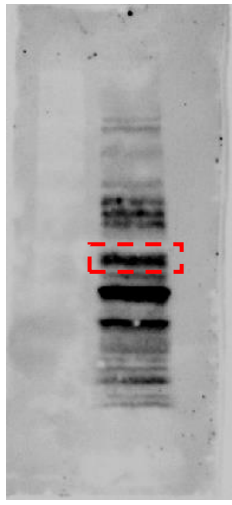

# MICU2 ( $\approx 50\text{kDa}$ )

02\_03\_23

HT29  
DLD1  
HCT116  
SW480  
SW620

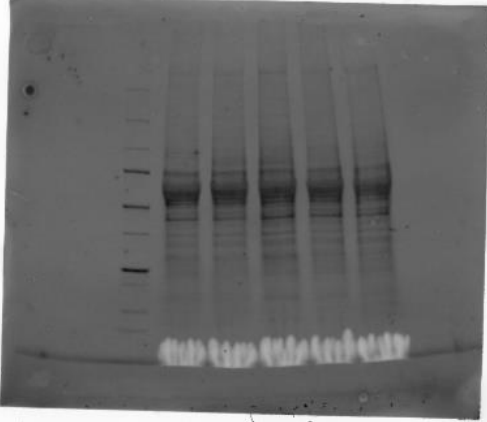

HT29  
DLD1  
HCT116  
SW480  
SW620

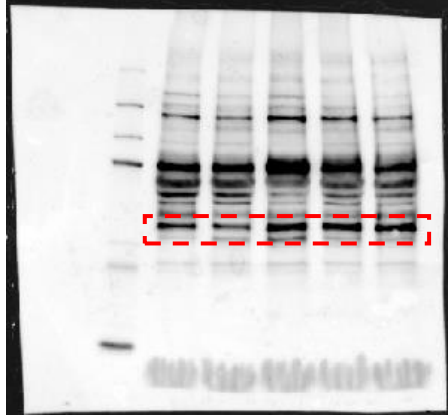

HT29  
DLD1  
HCT116  
SW480  
SW620

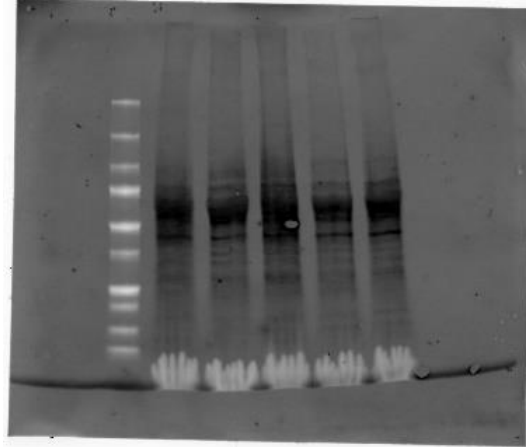

HT29  
DLD1  
HCT116  
SW480  
SW620

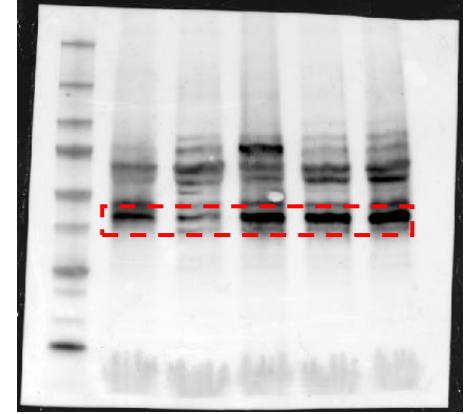

01\_04\_23

06\_04\_23

HT29  
DLD1  
HCT116

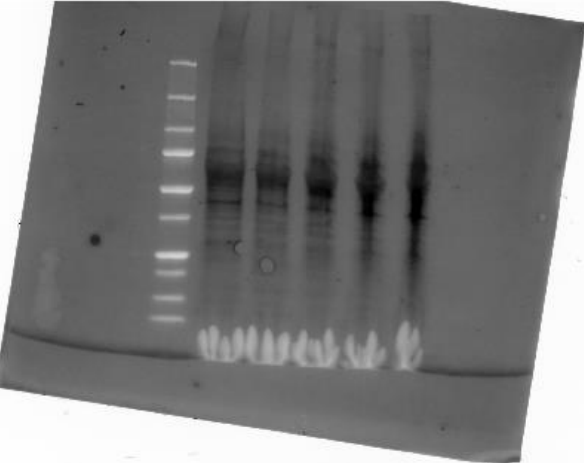

HT29  
DLD1  
HCT116

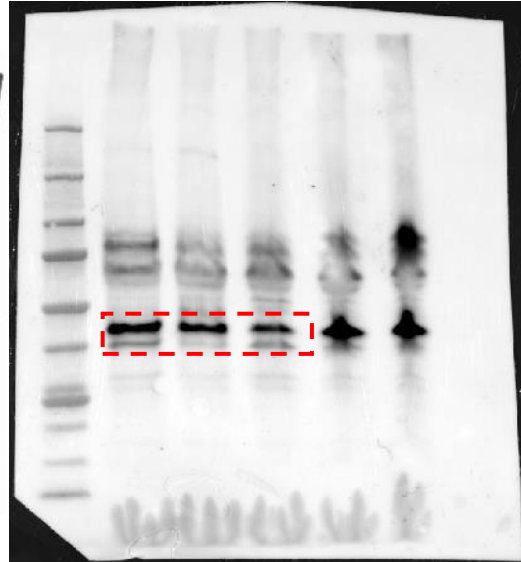

28\_04\_23

HT29  
DLD1  
SW480  
HCT116  
SW620  
HT29  
DLD1  
SW480  
HCT116  
SW620

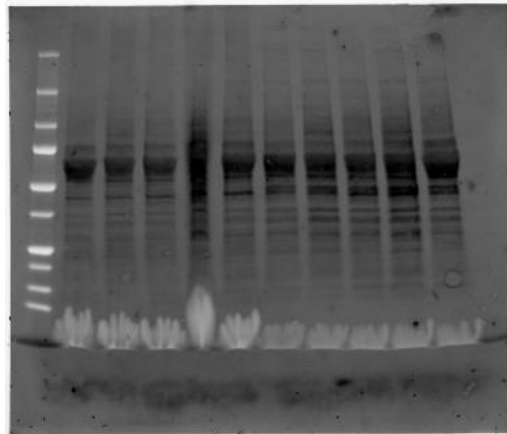

HT29  
DLD1  
SW480  
HCT116  
SW620  
HT29  
DLD1  
SW480  
HCT116  
SW620

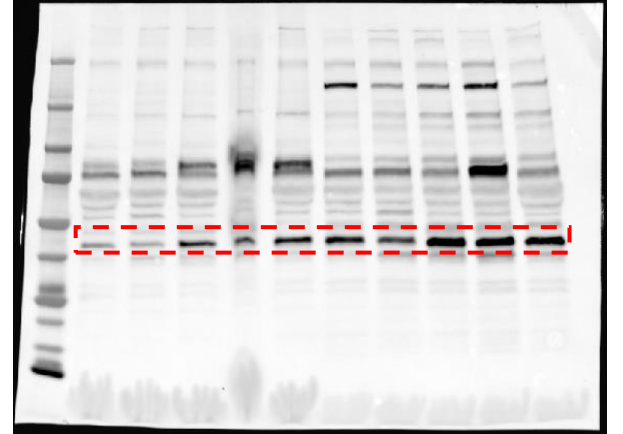

# MICU2 ( $\approx 50$ kDa)

06\_05\_23

NCM 356  
HT29  
DLD1  
SW480  
HCT116  
SW620

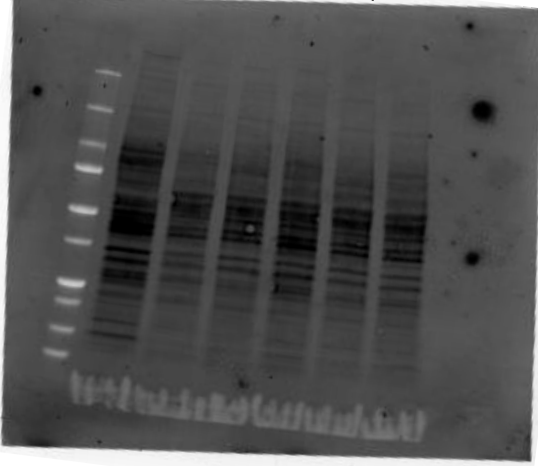

NCM 356  
HT29  
DLD1  
SW480  
HCT116  
SW620

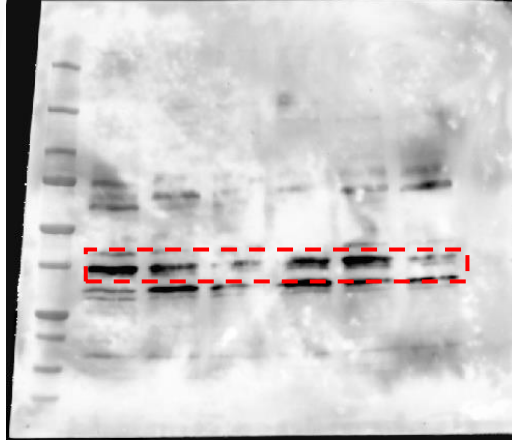

24\_05\_23

NCM 356  
NCM 356  
HT29  
DLD1  
SW480  
HCT116  
SW620

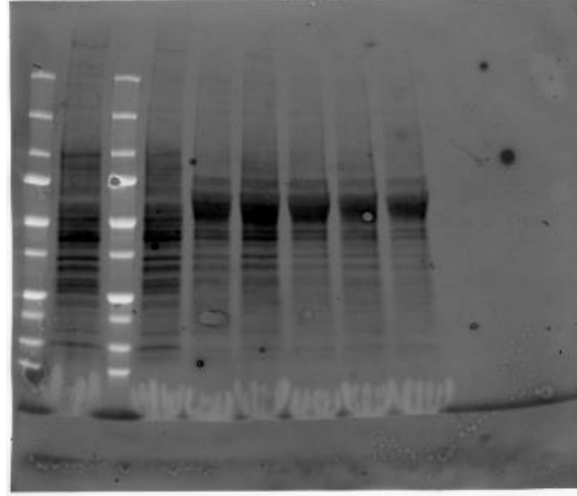

NCM 356  
NCM 356  
HT29  
DLD1  
SW480  
HCT116  
SW620

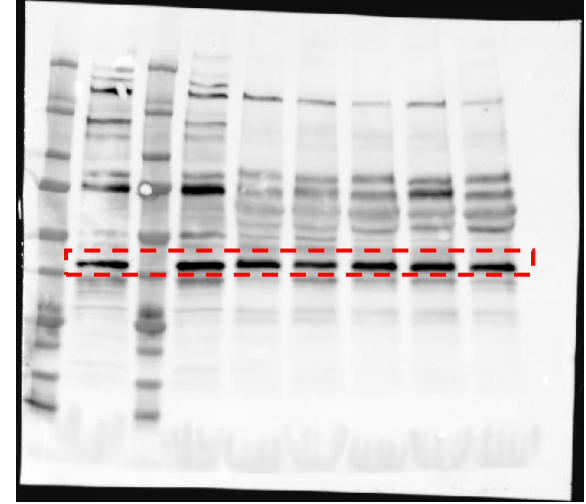

26\_05\_23

NCM 356  
NCM 356  
HT29  
DLD1  
SW480  
HCT116  
SW620

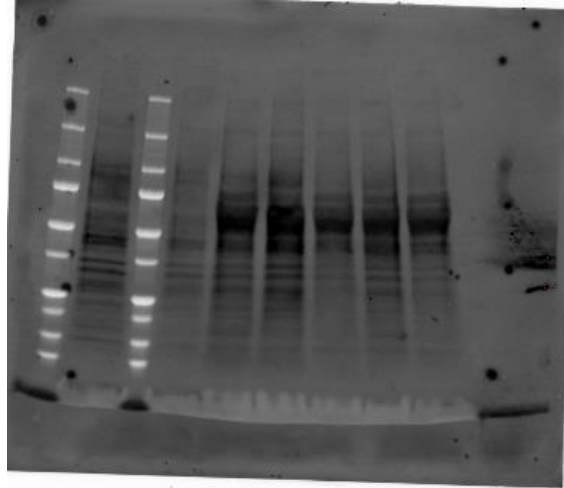

NCM 356  
NCM 356  
HT29  
DLD1  
SW480  
HCT116  
SW620

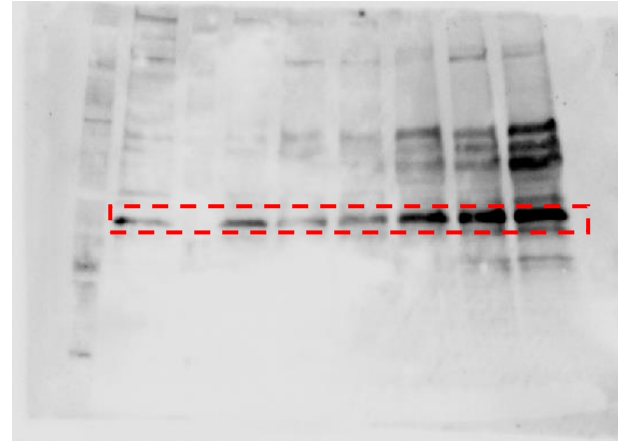

# MICU2 (≈50kDa)

26\_05\_23

NCM 356  
HT29  
DLD1  
SW480  
HCT116  
SW620

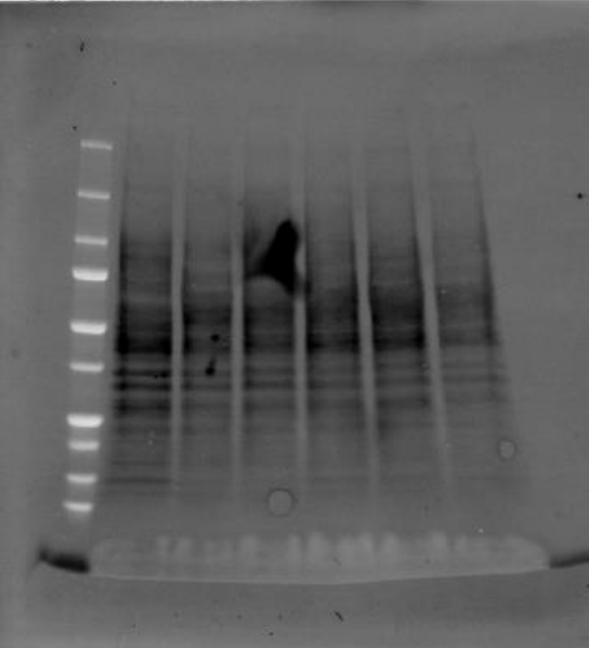

NCM 356  
HT29  
DLD1  
SW480  
HCT116  
SW620

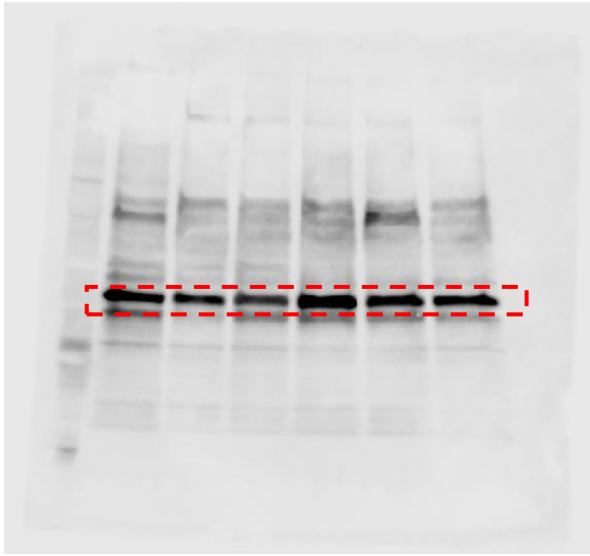

14\_06\_23

NCM 356  
NCM 356

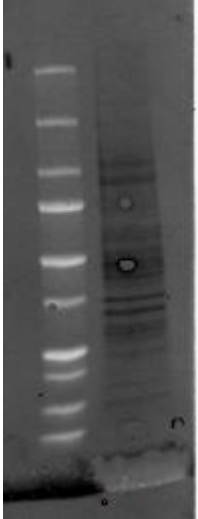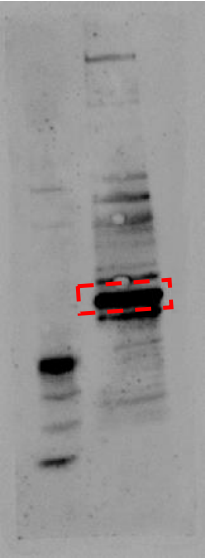

# MCU ( $\approx 35 / 40\text{kDa}$ )

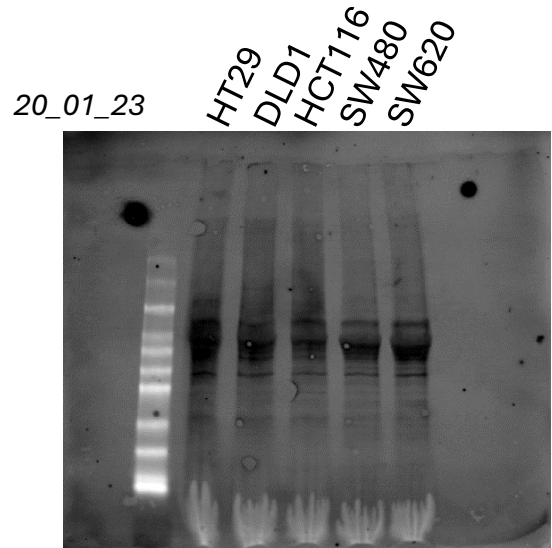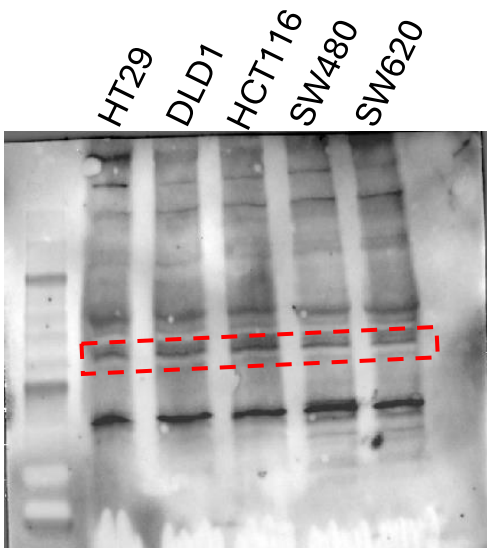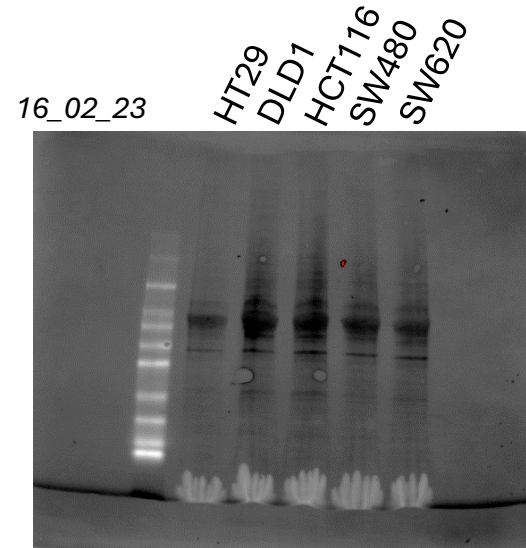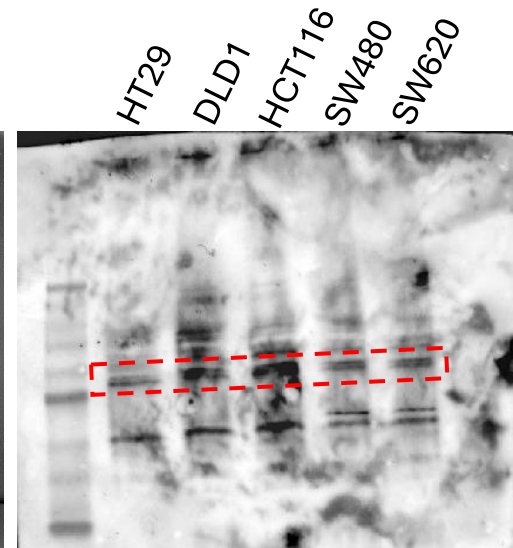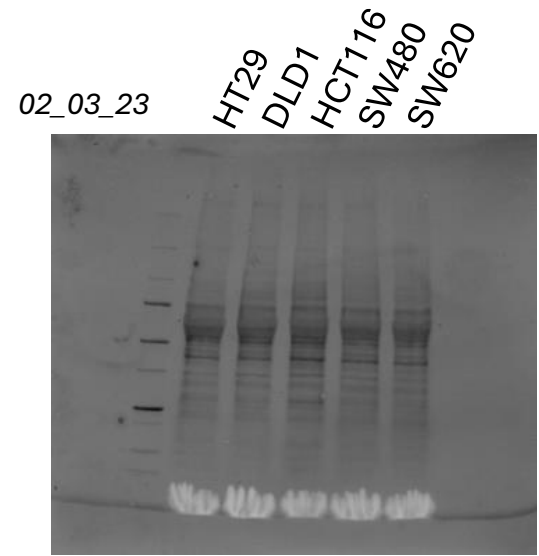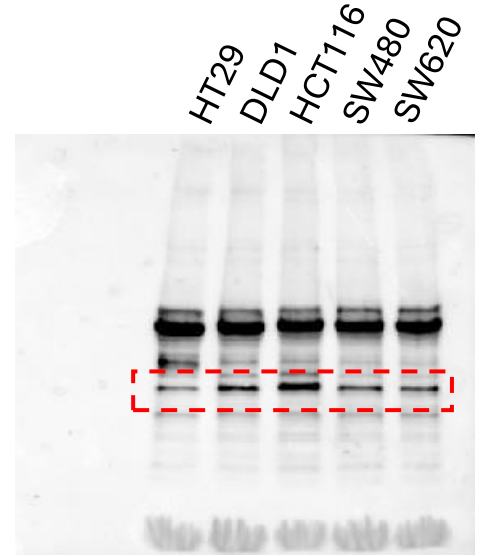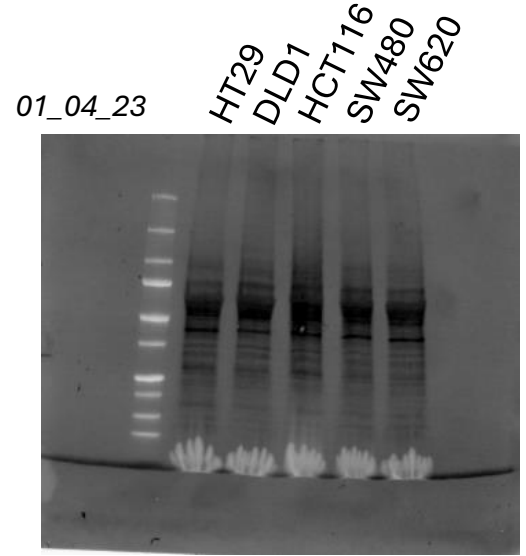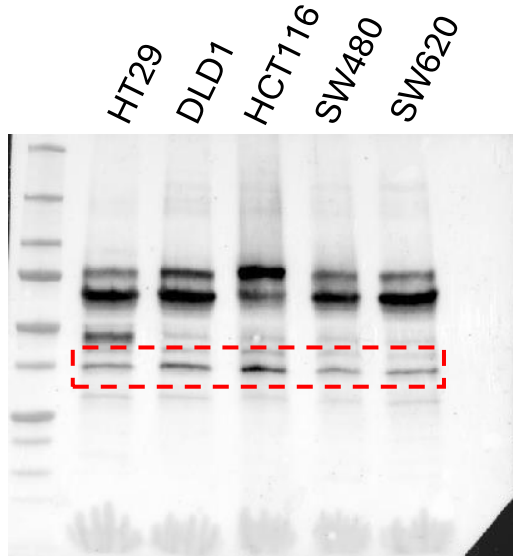

# MCU ( $\approx 35 / 40\text{kDa}$ )

28\_04\_23  
HT29  
DLD1  
SW480  
SW620  
HT29  
DLD1  
SW480  
HCT116  
SW620

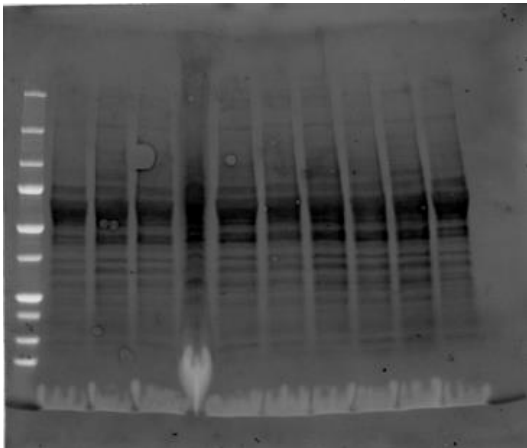

HT29  
DLD1  
SW480  
SW620  
HT29  
DLD1  
SW480  
HCT116  
SW620

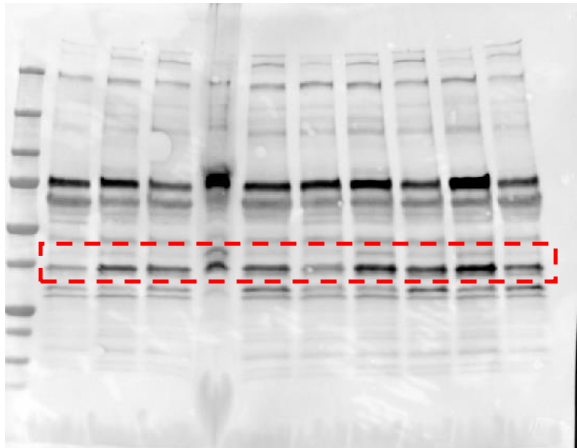

06\_05\_23  
NCM 356  
HT29  
DLD1  
SW480  
HCT116  
SW620

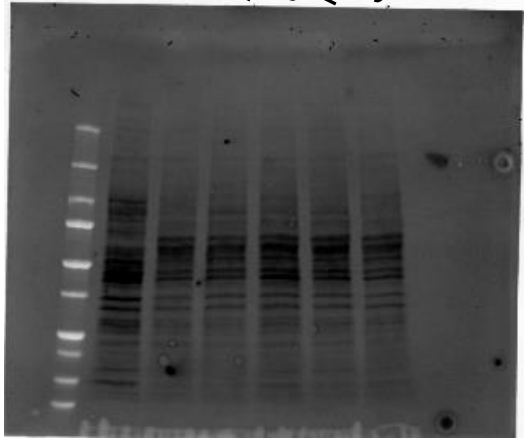

NCM 356  
HT29  
DLD1  
SW480  
HCT116  
SW620

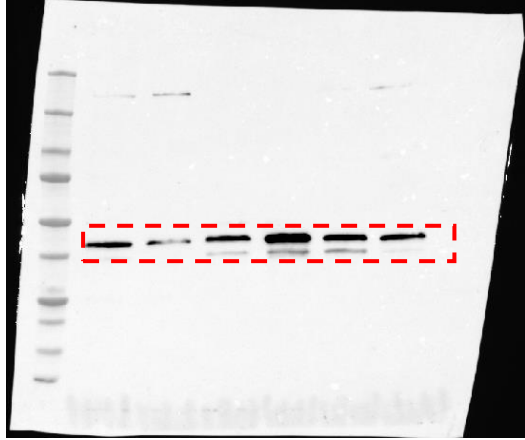

24\_05\_23  
NCM 356  
NCM 356  
HT29  
DLD1  
SW480  
HCT116  
SW620

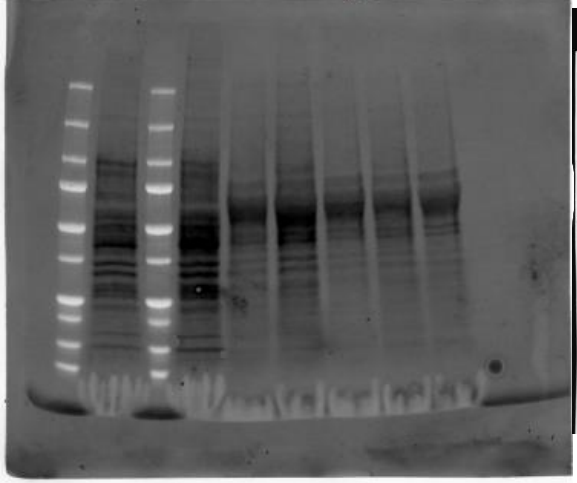

NCM 356  
NCM 356  
HT29  
DLD1  
SW480  
HCT116  
SW620

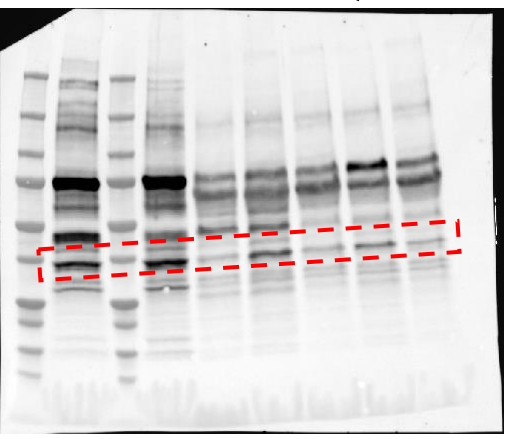



KO lines  
Figure 1D

# MICU1 (≈50 / 55kDa)

16\_11\_22

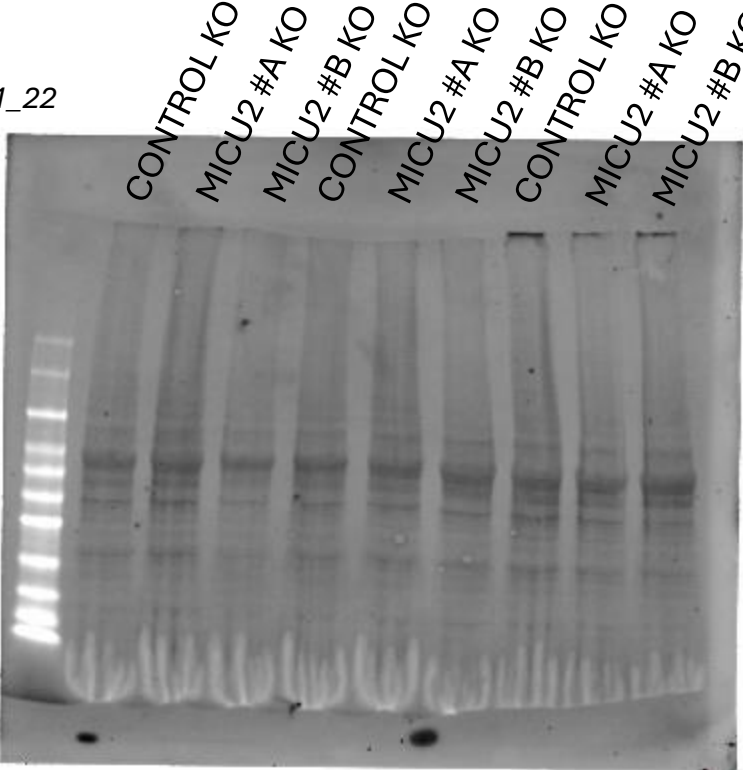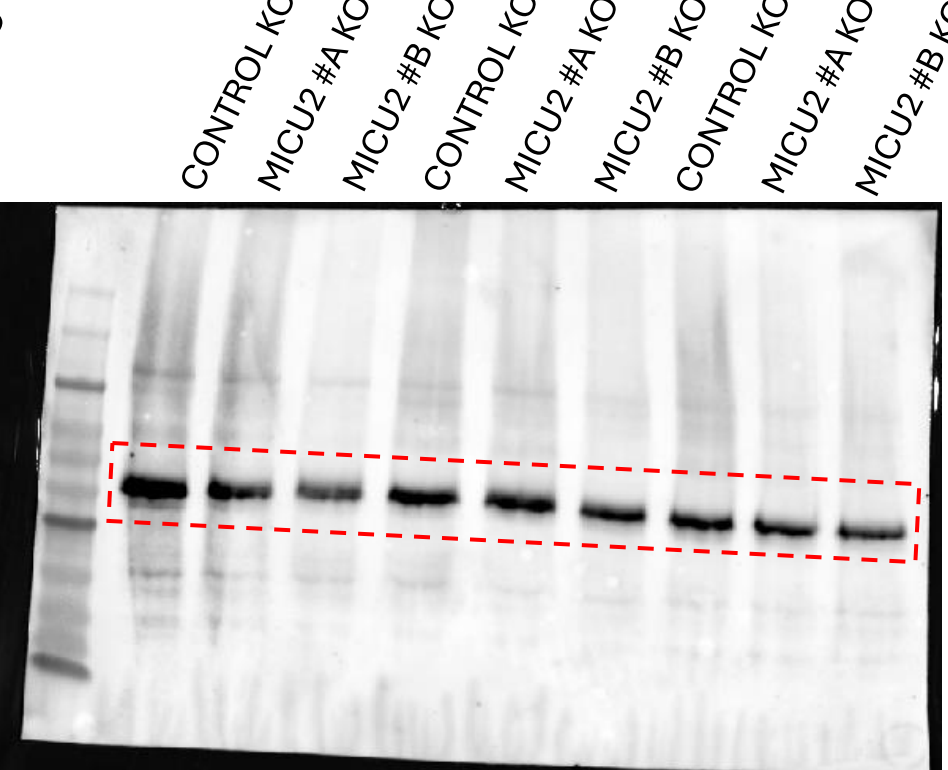

# MICU1 (≈50 / 55kDa)

25\_11\_22

CONTROL KO  
MICU2 #A KO  
MICU2 #B KO  
CONTROL KO  
MICU2 #A KO  
MICU2 #B KO

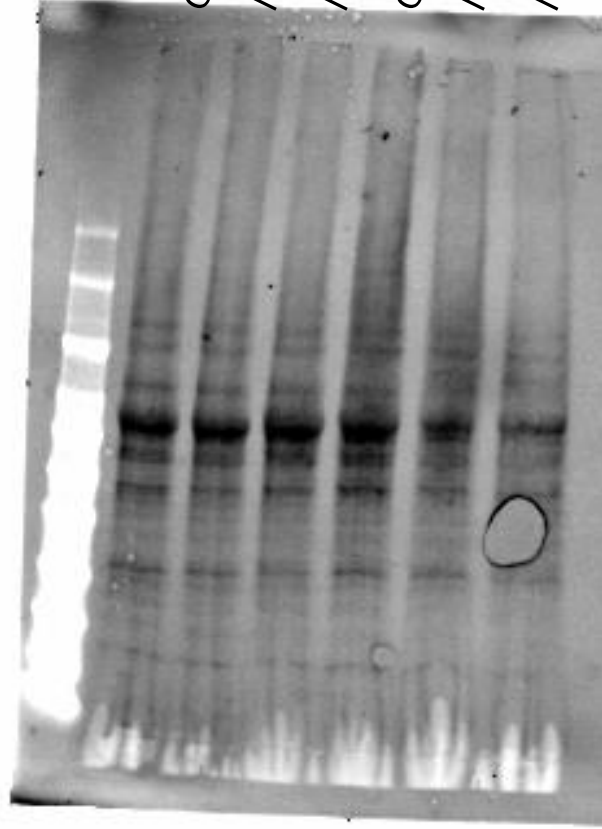

CONTROL KO  
MICU2 #A KO  
MICU2 #B KO  
CONTROL KO  
MICU2 #A KO  
MICU2 #B KO

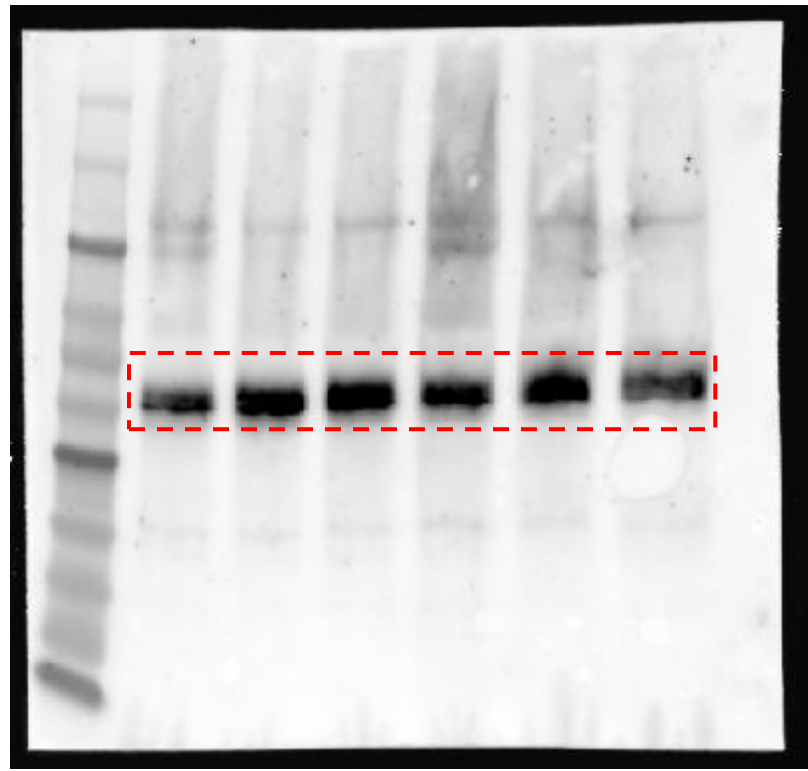

# MICU2 (≈50kDa)

04\_02\_22  
CONTROL KO  
MICU2 #A KO  
MICU2 #B KO

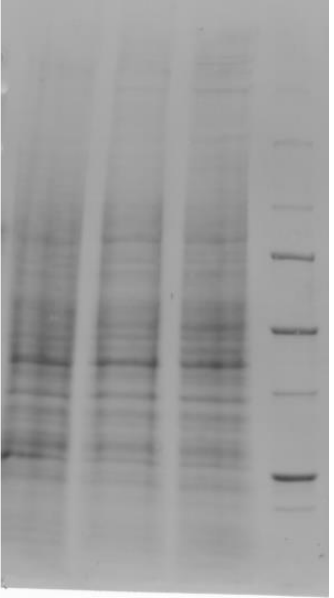

CONTROL KO  
MICU2 #A KO  
MICU2 #B KO

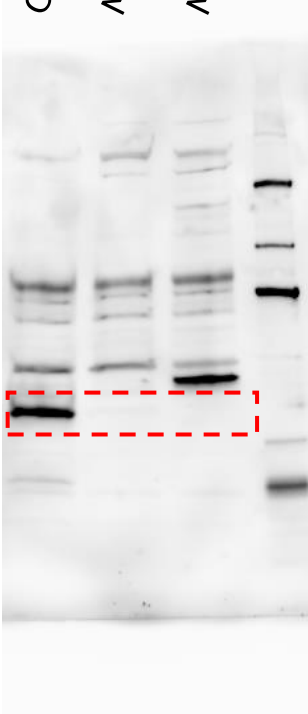

10\_02\_22  
CONTROL KO  
MICU2 #A KO  
MICU2 #B KO

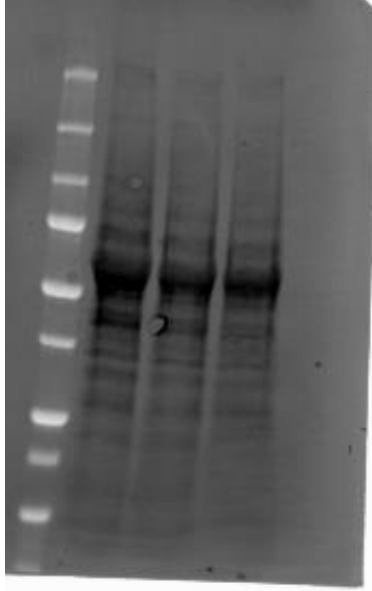

CONTROL KO  
MICU2 #A KO  
MICU2 #B KO

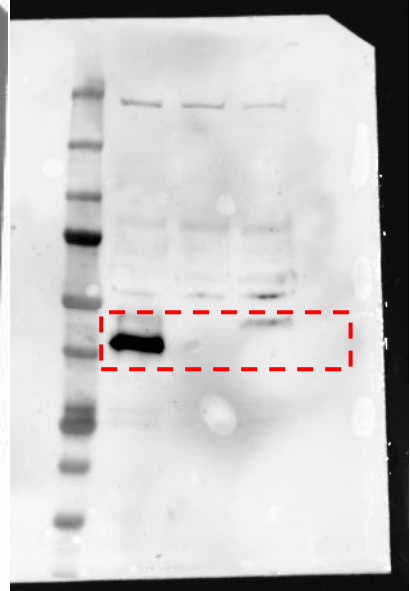

31\_03\_22  
CONTROL KO  
MICU2 #A KO  
MICU2 #B KO

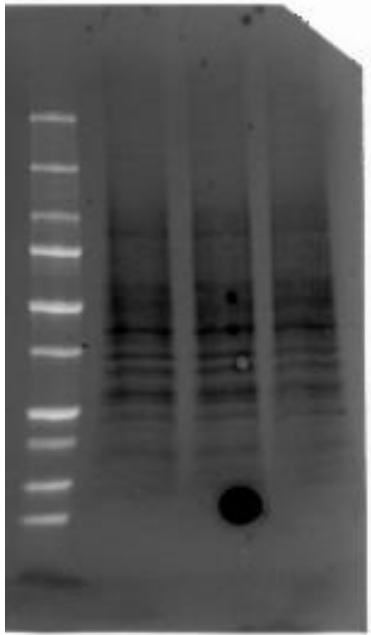

CONTROL KO  
MICU2 #A KO  
MICU2 #B KO

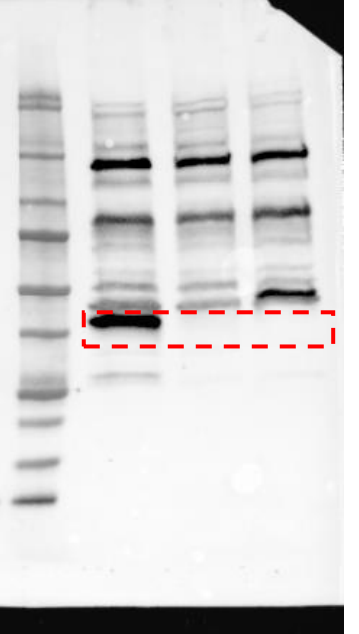

# MICU2 (≈50kDa)

27\_04\_22

CONTROL KO  
MICU2 #A KO  
MICU2 #B KO

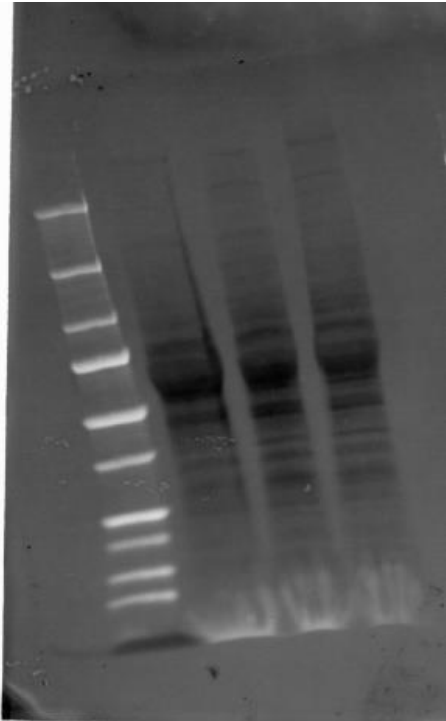

CONTROL KO  
MICU2 #A KO  
MICU2 #B KO

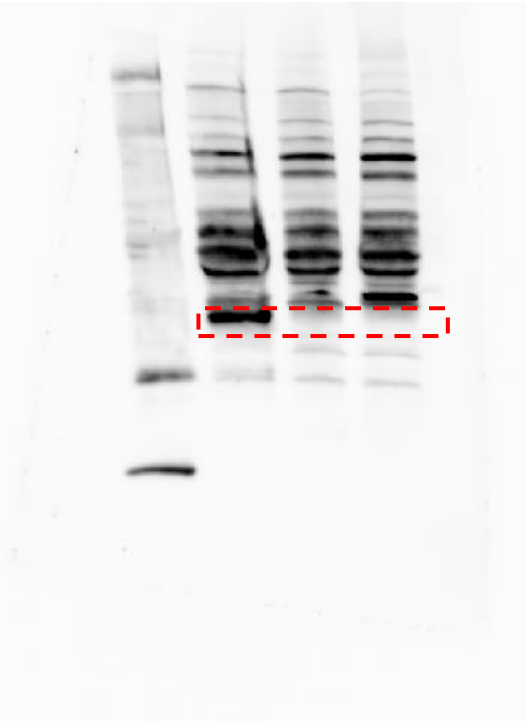

# MICU2 (≈50kDa)

28\_04\_22

CONTROL KO  
MICU2 #A KO  
MICU2 #B KO

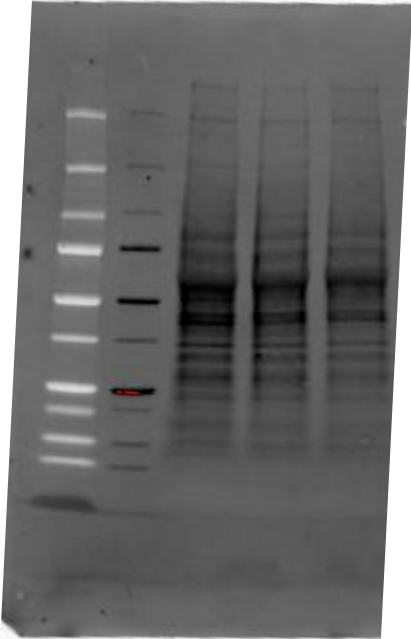

CONTROL KO  
MICU2 #A KO  
MICU2 #B KO

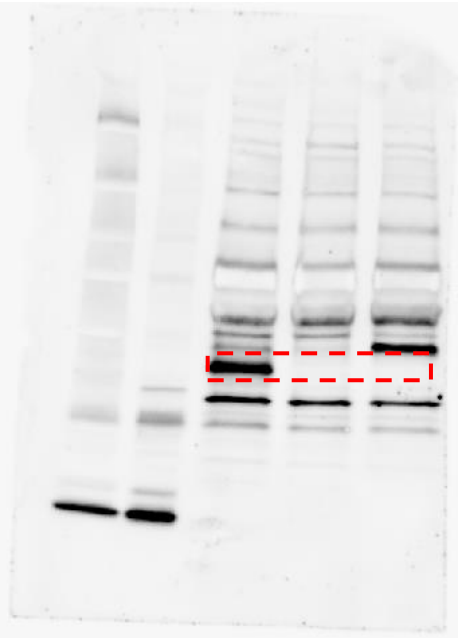

28\_04\_22

CONTROL KO  
MICU2 #A KO  
MICU2 #B KO

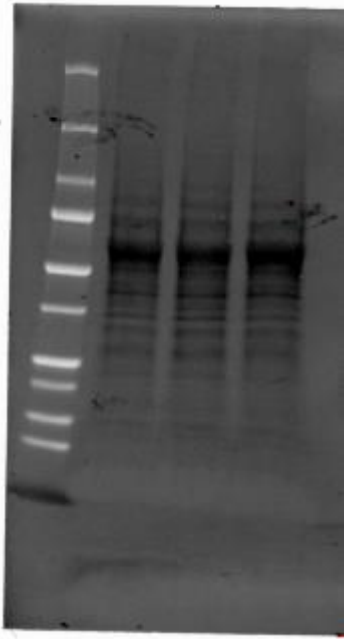

CONTROL KO  
MICU2 #A KO  
MICU2 #B KO

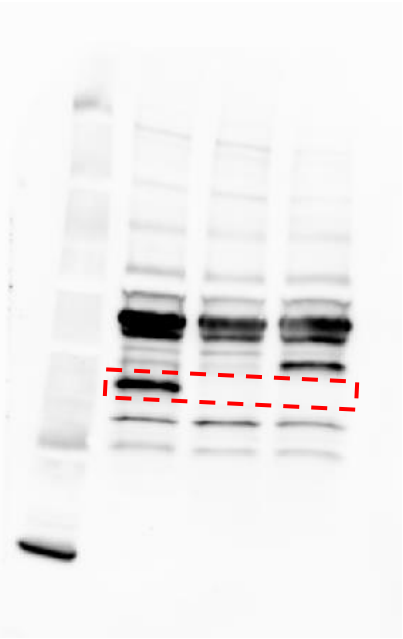

# MCU ( $\approx 35 / 40$ kDa)

31\_03\_22

CONTROL KO  
MICU2 #A KO  
MICU2 #B KO

CONTROL KO  
MICU2 #A KO  
MICU2 #B KO

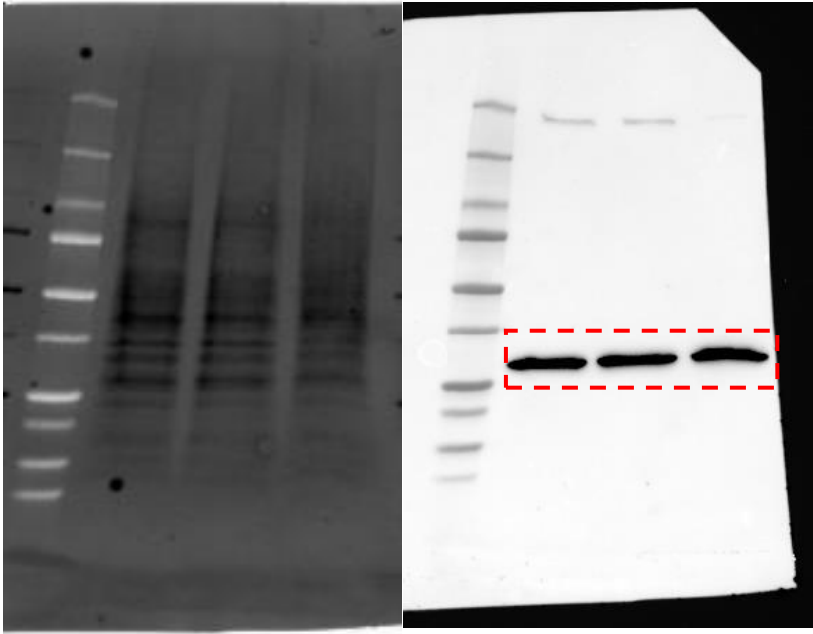

21\_04\_22

CONTROL KO  
MICU2 #A KO  
MICU2 #B KO

CONTROL KO  
MICU2 #A KO  
MICU2 #B KO

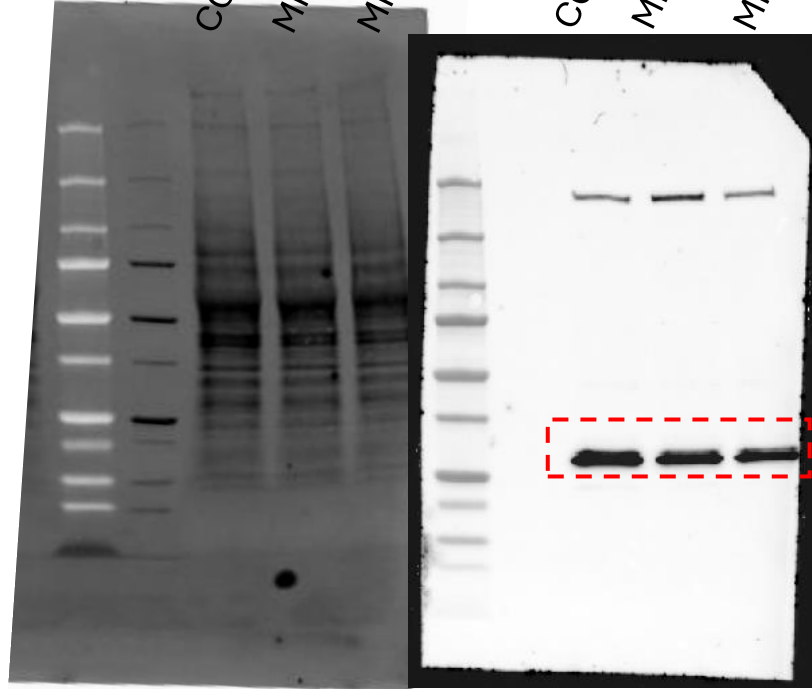

22\_04\_22

CONTROL KO  
MICU2 #A KO  
MICU2 #B KO

CONTROL KO  
MICU2 #A KO  
MICU2 #B KO

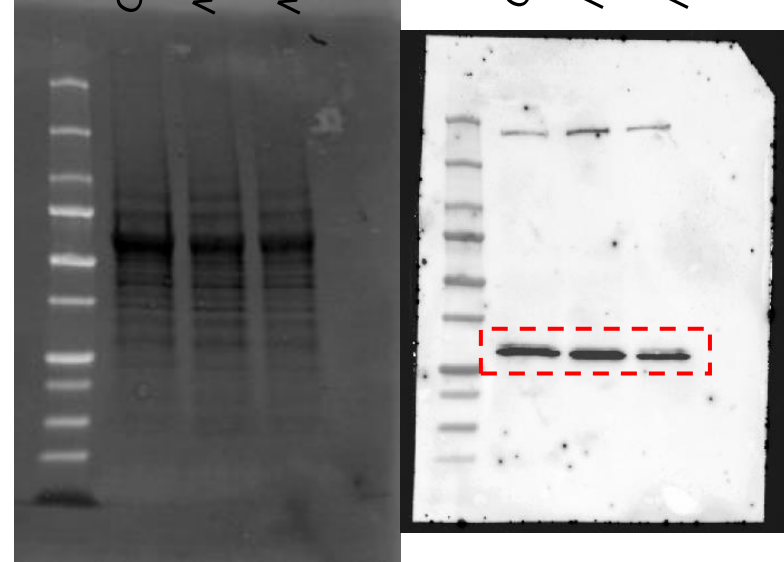

# MCU ( $\approx 35 / 40\text{kDa}$ )

22\_04\_22

CONTROL KO  
MICU2 #A KO  
MICU2 #B KO

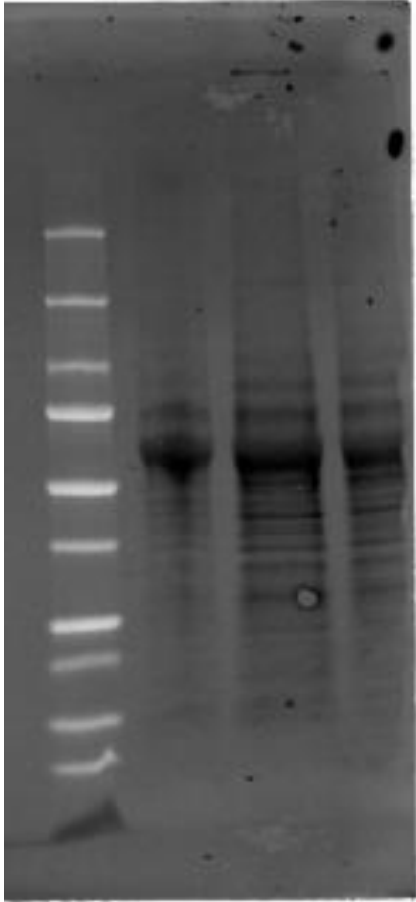

CONTROL KO  
MICU2 #A KO  
MICU2 #B KO

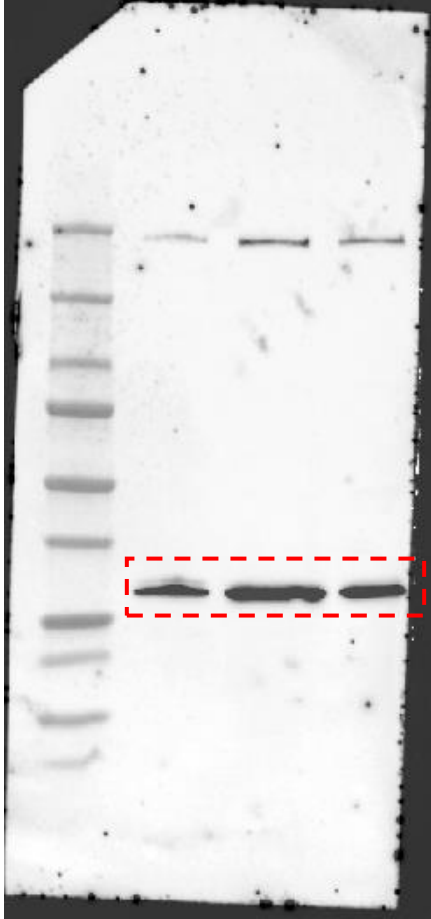

10\_05\_22

CONTROL KO  
MICU2 #A KO  
MICU2 #B KO

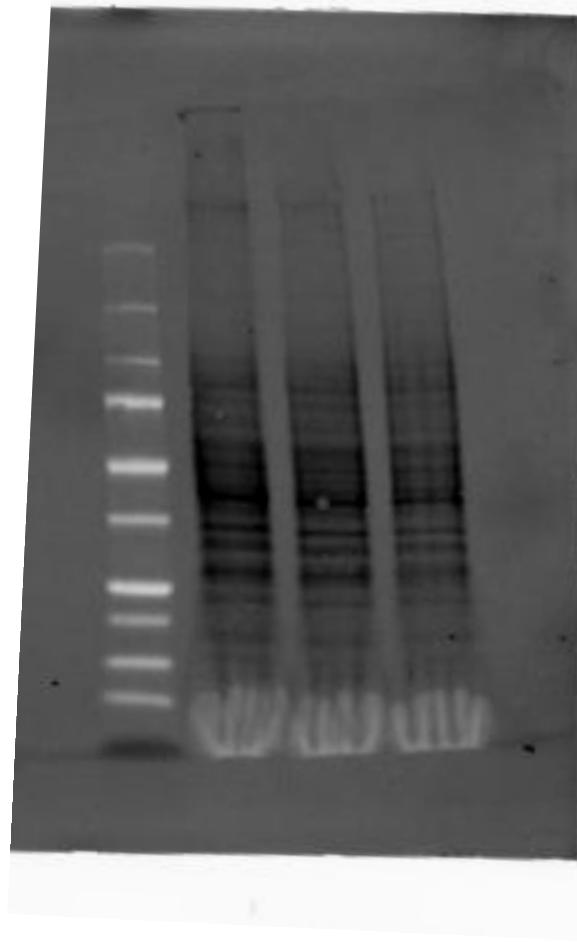

CONTROL KO  
MICU2 #A KO  
MICU2 #B KO

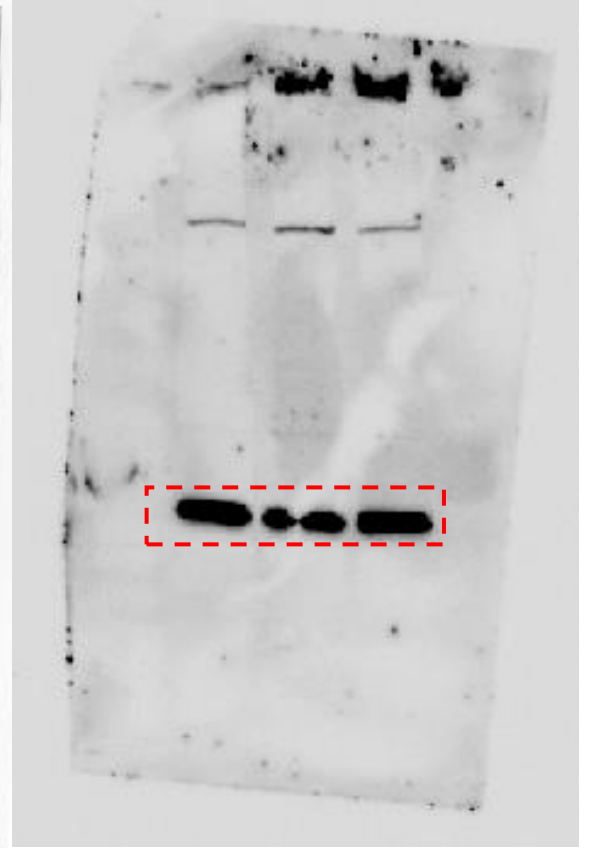



KO lines  
Figure 1E

# HCT116

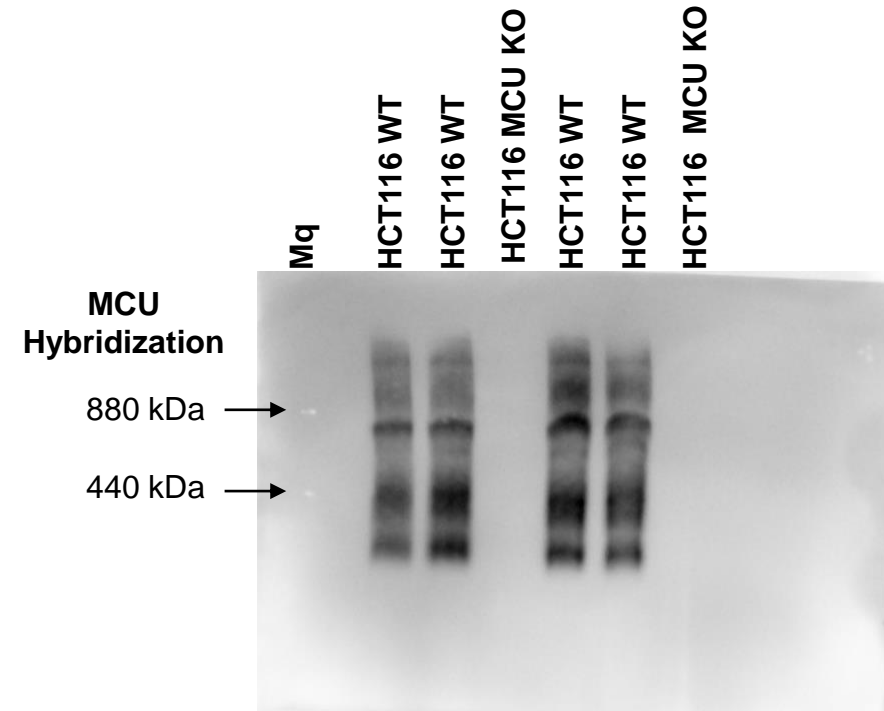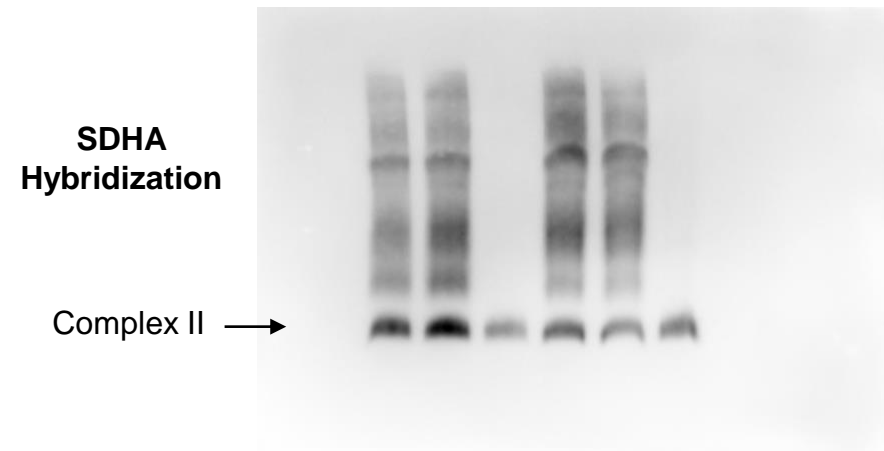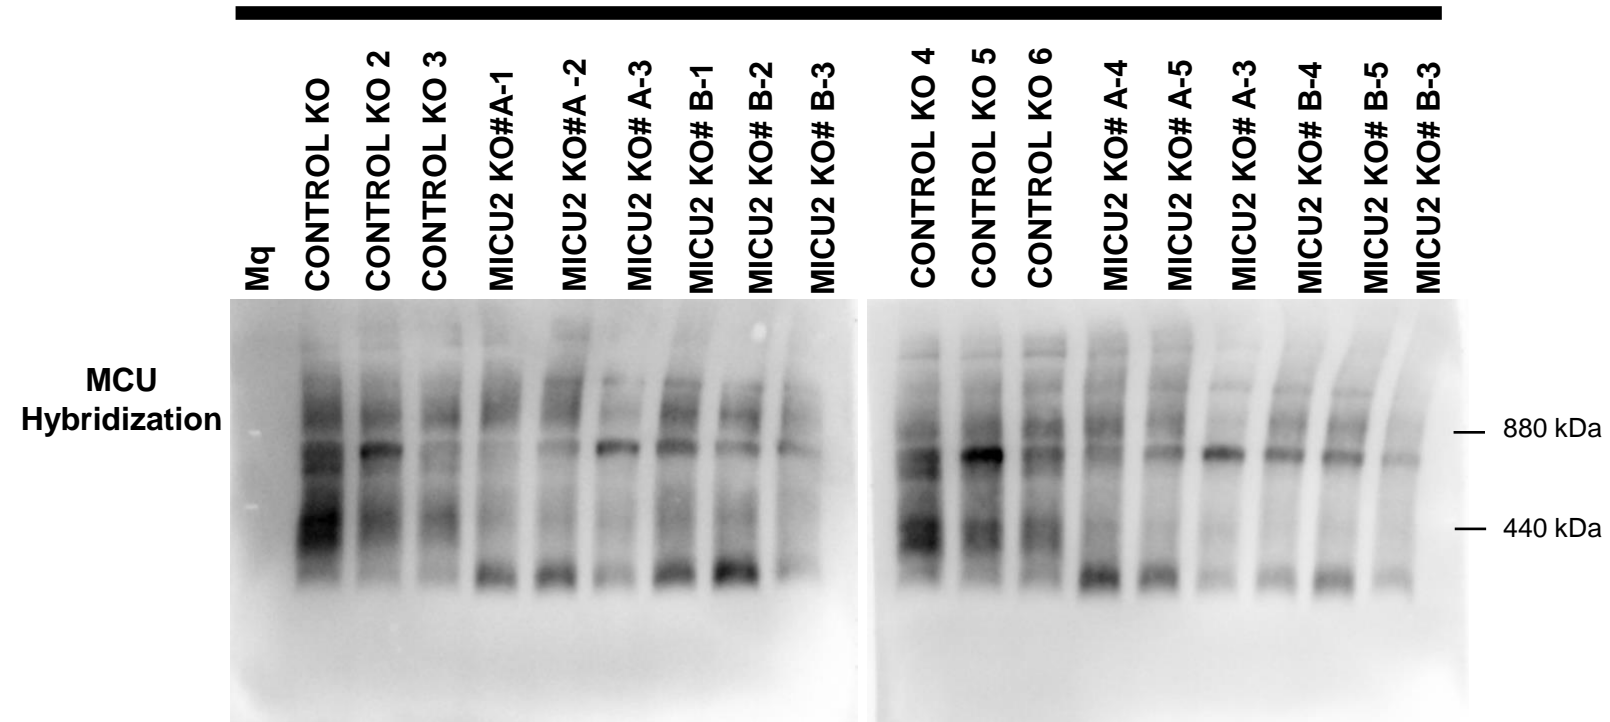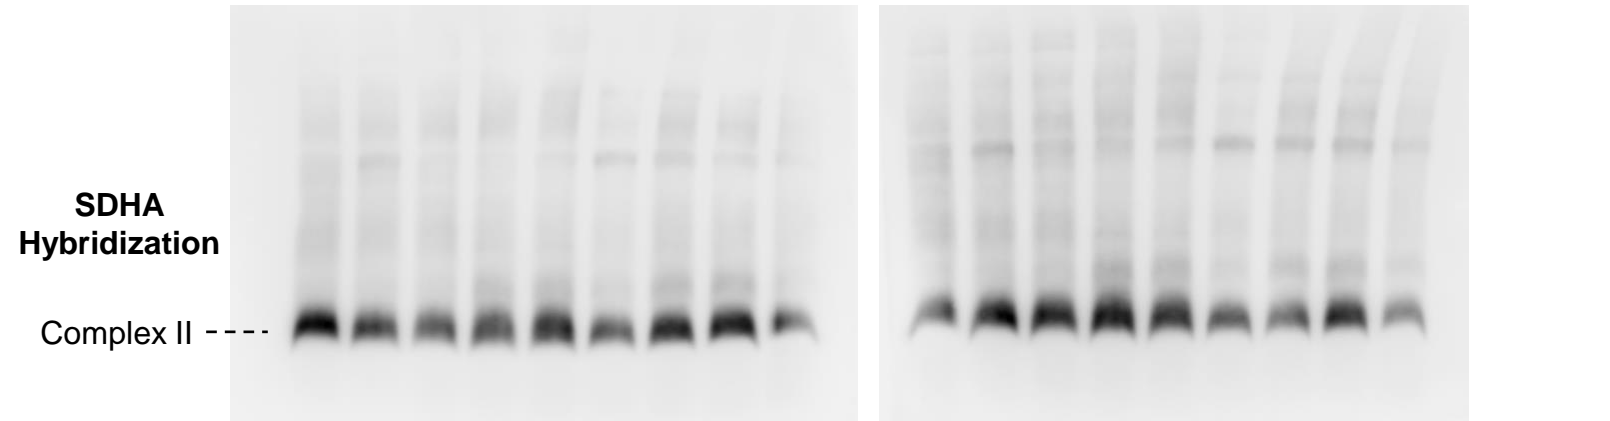

KO lines  
Figure 3D

# OPA1 ( $\approx 80 / 100\text{kDa}$ )

25\_04\_22

CONTROL KO  
MICU2 #A KO  
MICU2 #B KO

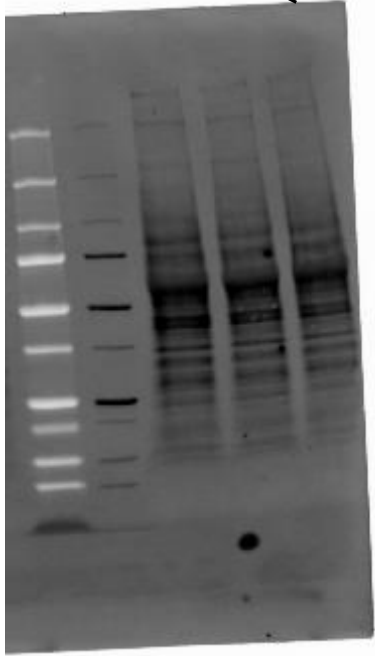

CONTROL KO  
MICU2 #A KO  
MICU2 #B KO

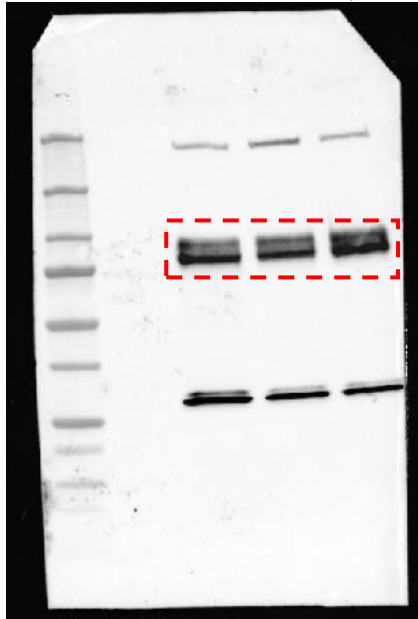

25\_04\_22

CONTROL KO  
MICU2 #A KO  
MICU2 #B KO

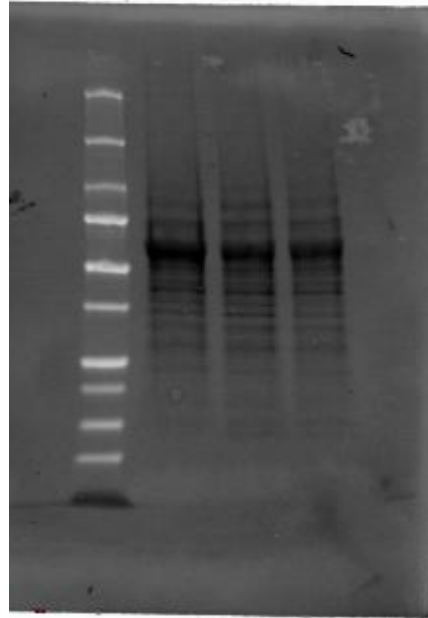

CONTROL KO  
MICU2 #A KO  
MICU2 #B KO

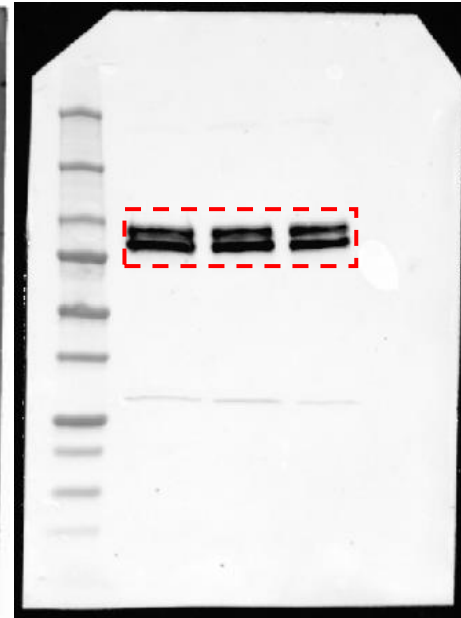

# OPA1 ( $\approx 80 / 100\text{kDa}$ )

09\_05\_22

CONTROL KO  
MICU2 #A KO  
MICU2 #B KO

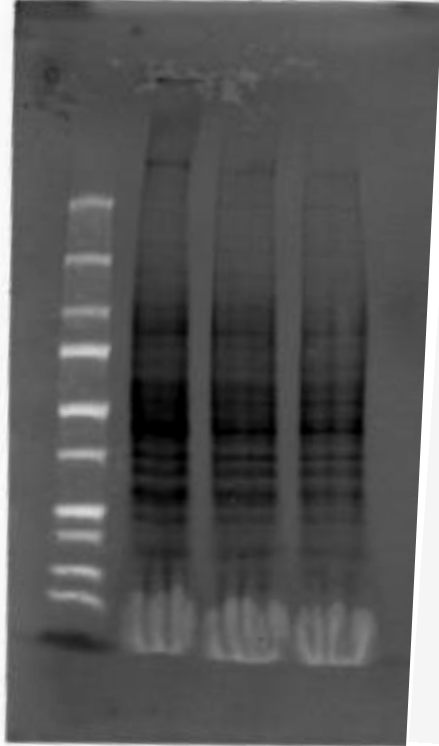

CONTROL KO  
MICU2 #A KO  
MICU2 #B KO

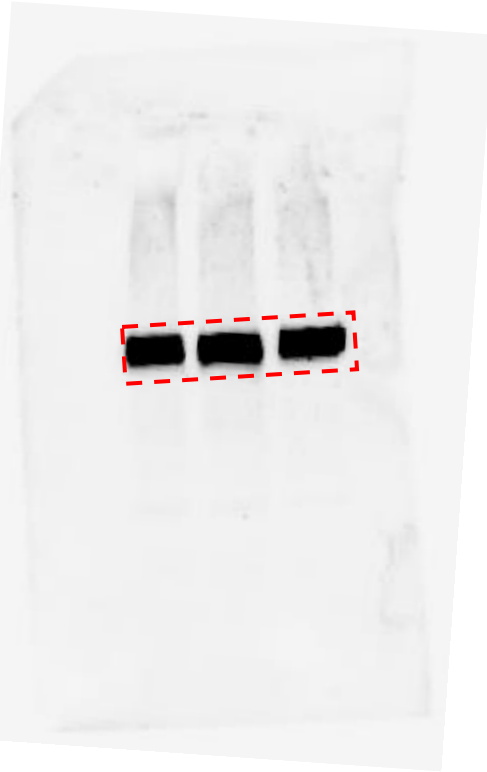

02\_12\_22

CONTROL KO  
MICU2 #A KO  
MICU2 #B KO  
CONTROL KO  
MICU2 #A KO  
MICU2 #B KO

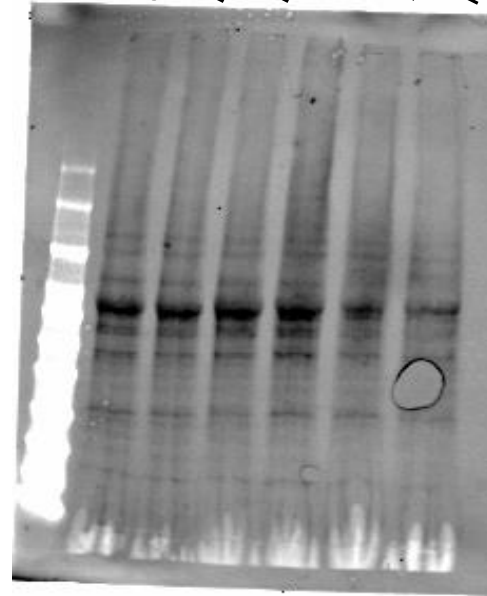

CONTROL KO  
MICU2 #A KO  
MICU2 #B KO  
CONTROL KO  
MICU2 #A KO  
MICU2 #B KO

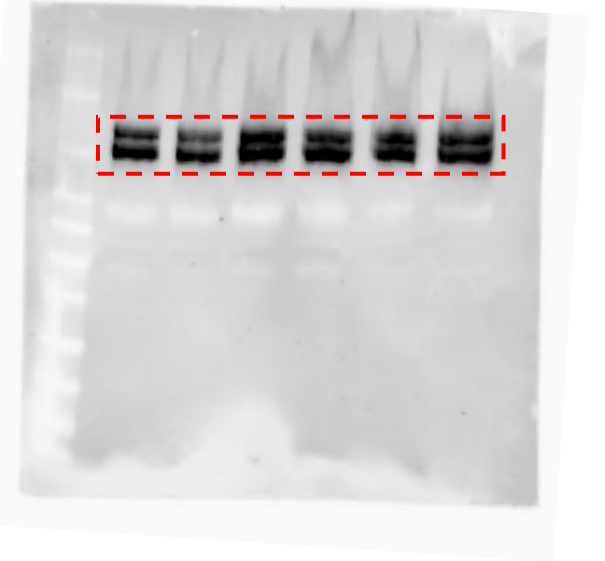

# MFN2 ( $\approx 80\text{kDa}$ )

01\_02\_22

MICU2 #B KO  
MICU2 #A KO  
CONTROL KO

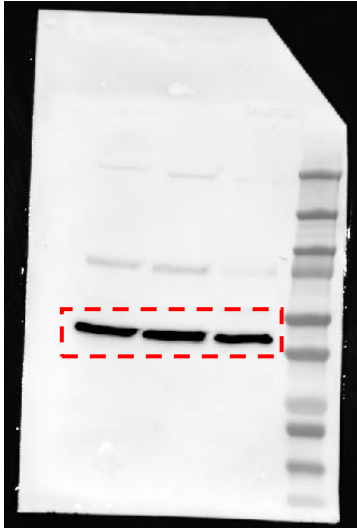

Actine

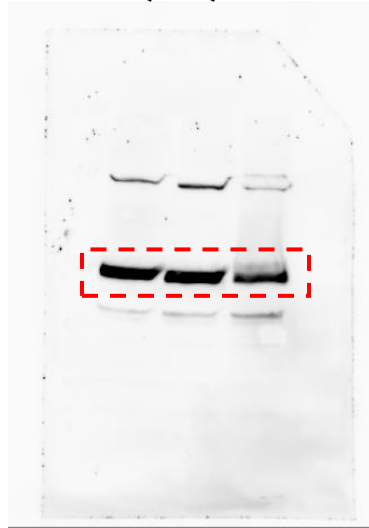

21\_04\_22

CONTROL KO  
MICU2 #A KO  
MICU2 #B KO

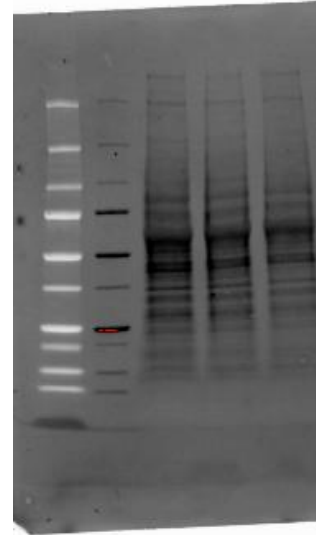

CONTROL KO  
MICU2 #A KO  
MICU2 #B KO

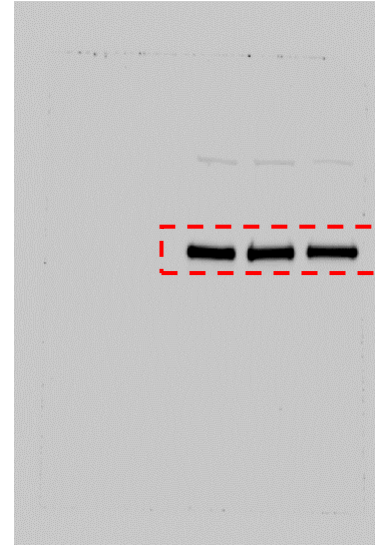

# MFN2 ( $\approx 80\text{kDa}$ )

22\_04\_22

CONTROL KO  
MICU2 #A KO  
MICU2 #B KO

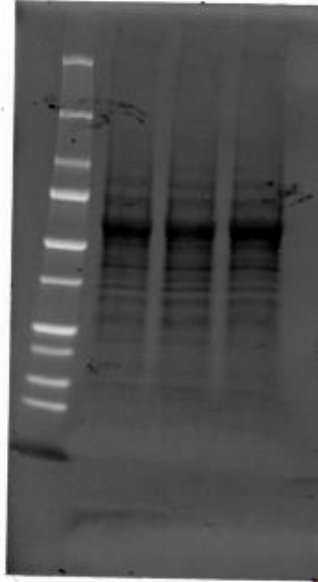

CONTROL KO  
MICU2 #A KO  
MICU2 #B KO

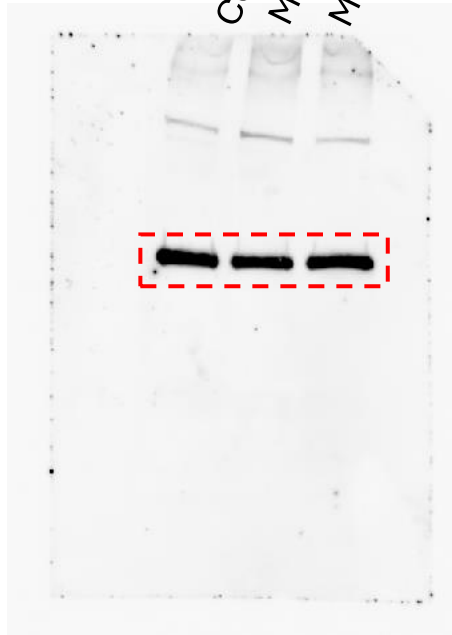

22\_04\_22

CONTROL KO  
MICU2 #A KO  
MICU2 #B KO

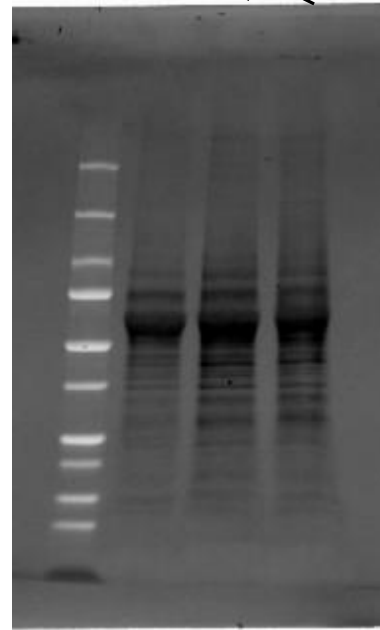

CONTROL KO  
MICU2 #A KO  
MICU2 #B KO

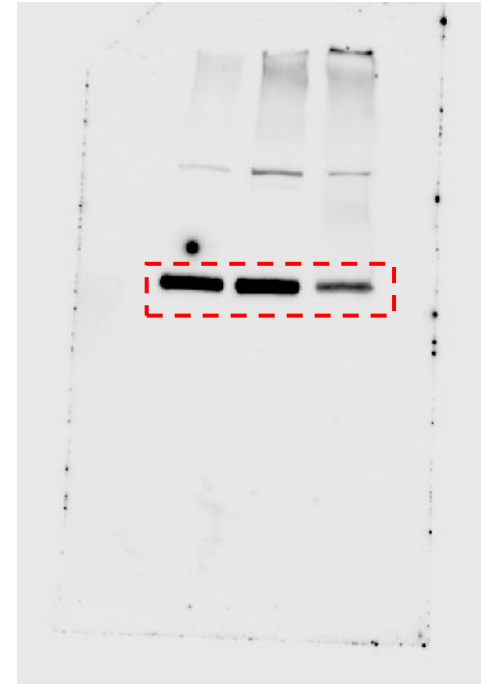

# MFN2 ( $\approx 80\text{kDa}$ )

06\_05\_22

CONTROL KO  
MICU2 #A KO  
MICU2 #B KO

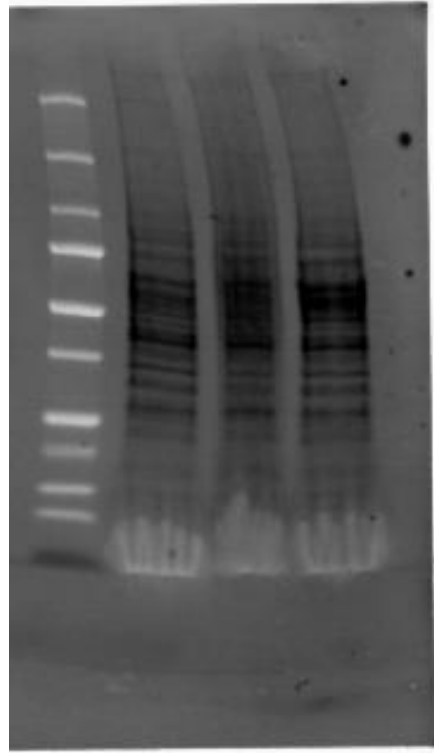

CONTROL KO  
MICU2 #A KO  
MICU2 #B KO

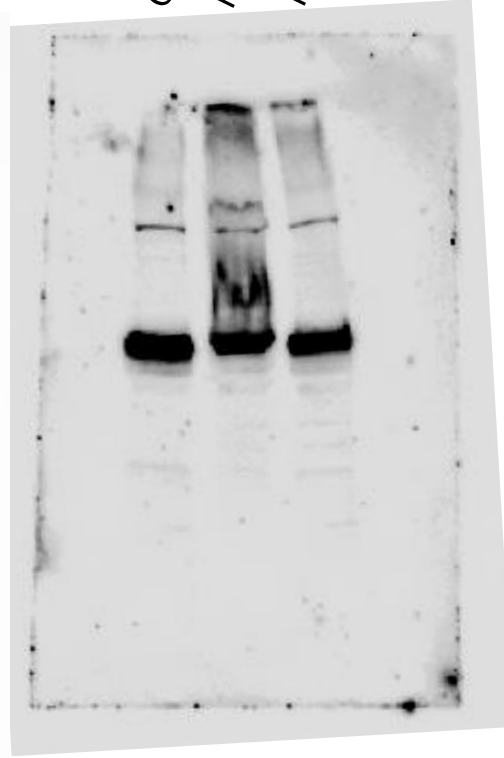



# P-DRP1 (≈80kDa)

15\_06\_22

CONTROL KO  
MICU2 #A KO  
MICU2 #B KO

CONTROL KO  
MICU2 #A KO  
MICU2 #B KO

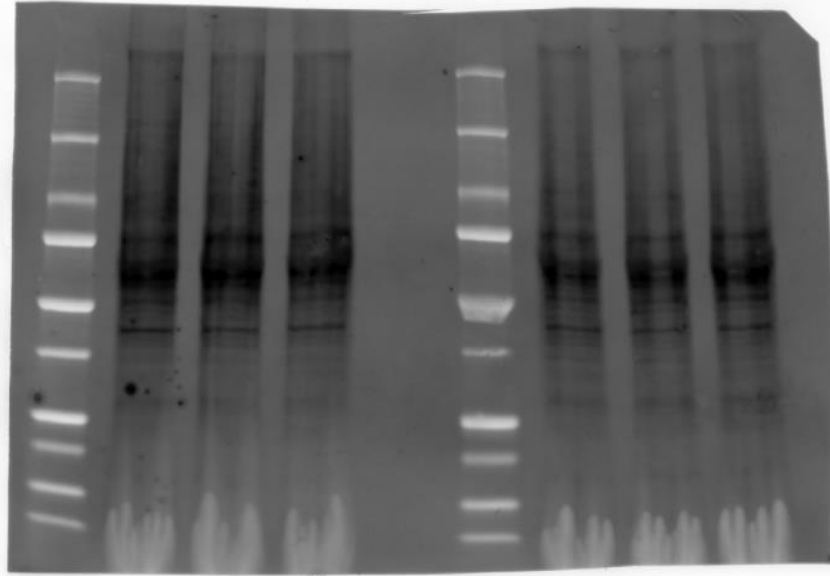

CONTROL KO  
MICU2 #A KO  
MICU2 #B KO

CONTROL KO  
MICU2 #A KO  
MICU2 #B KO

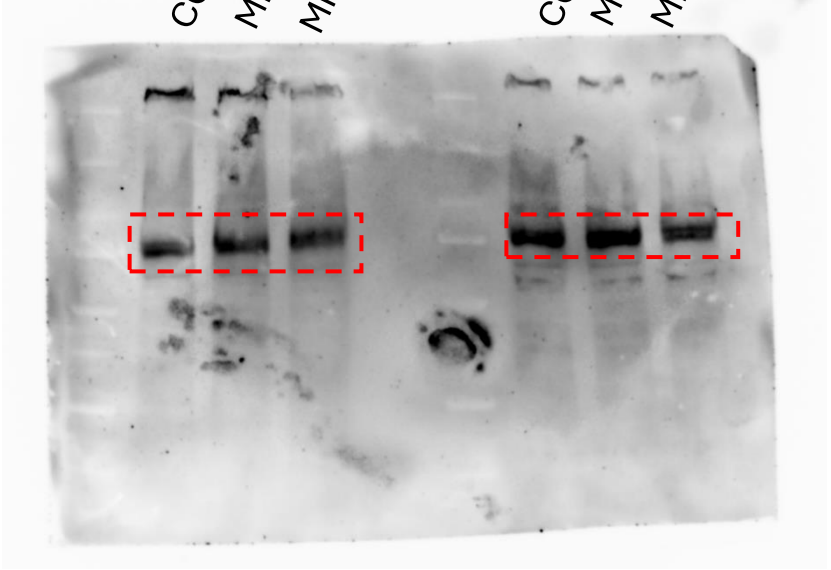

# P-DRP1 (≈80kDa)

15\_06\_22

CONTROL KO  
MICU2 #A KO  
MICU2 #B KO

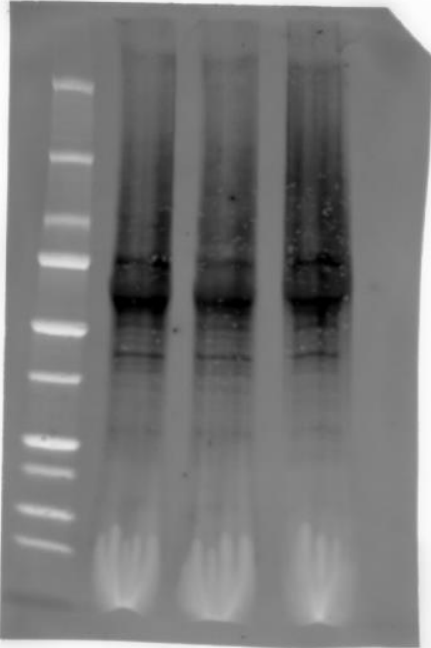

CONTROL KO  
MICU2 #A KO  
MICU2 #B KO

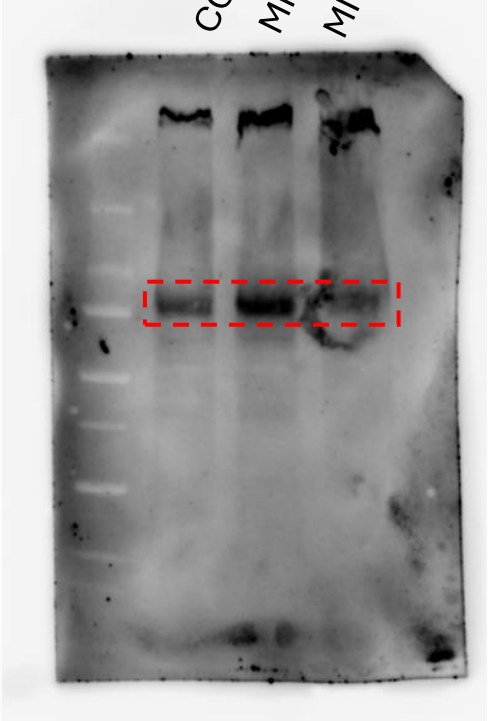

01\_07\_22

CONTROL KO  
MICU2 #A KO  
MICU2 #B KO

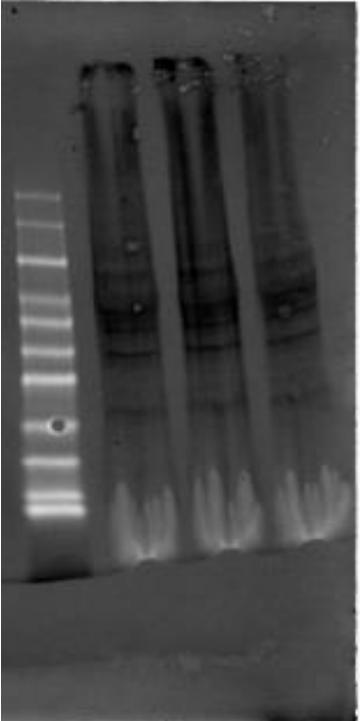

CONTROL KO  
MICU2 #A KO  
MICU2 #B KO

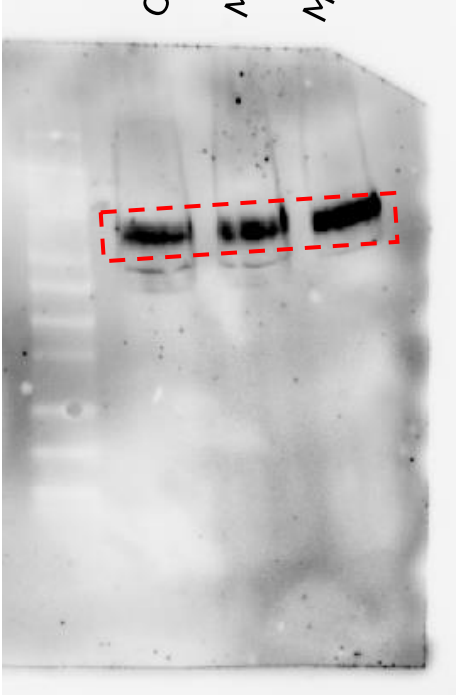

# P-DRP1 (≈80kDa)

25\_11\_22

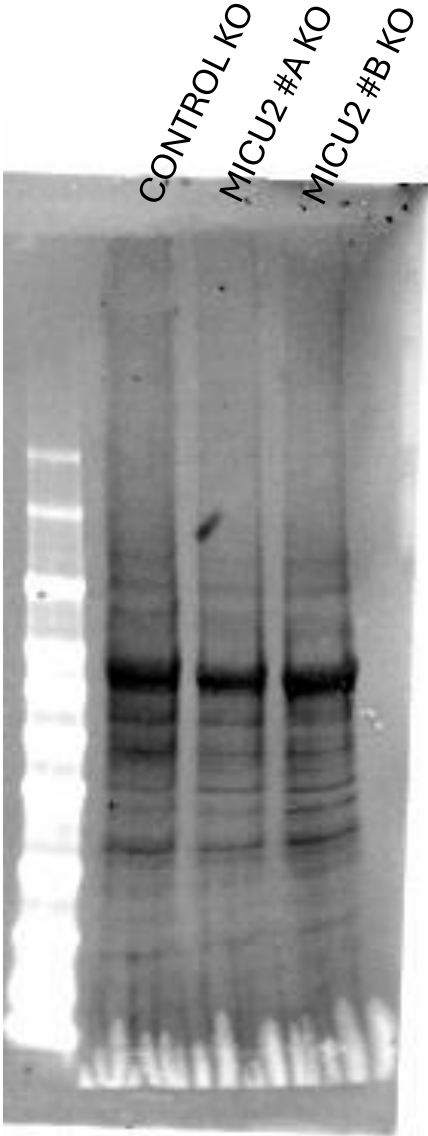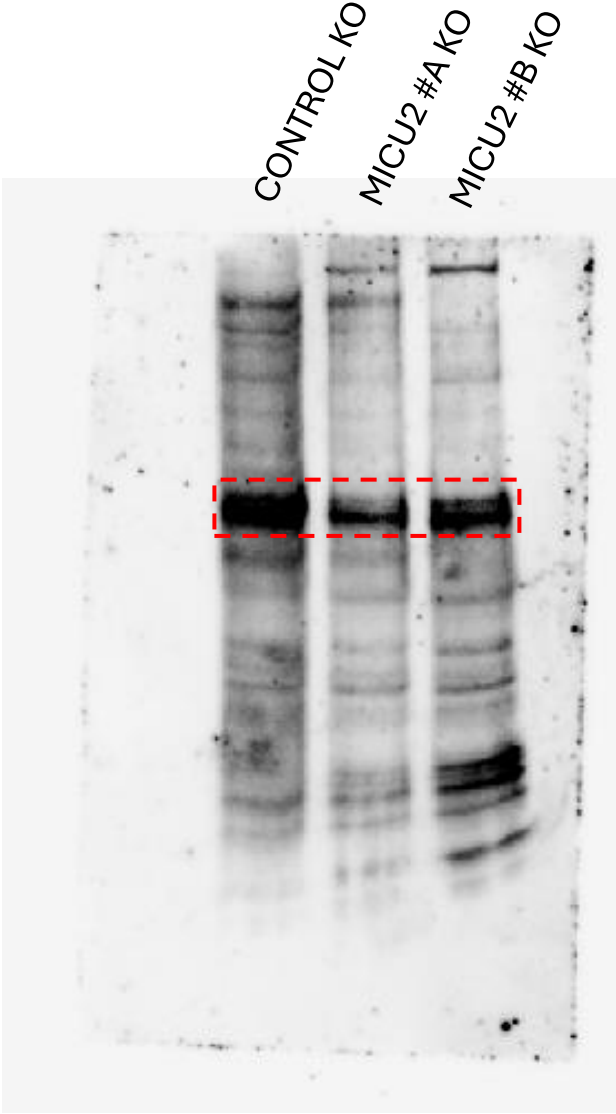

# DRP1 (≈80kDa)

19\_05\_22

CONTROL KO  
MICU2 #A KO  
MICU2 #B KO

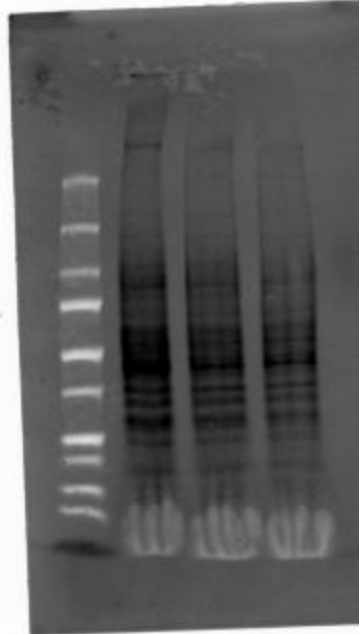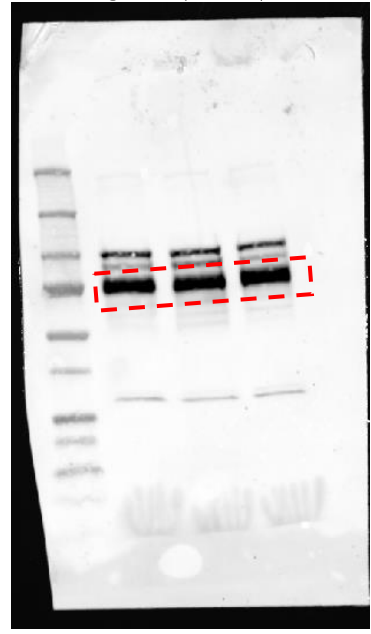

19\_05\_22

CONTROL KO  
MICU2 #A KO  
MICU2 #B KO

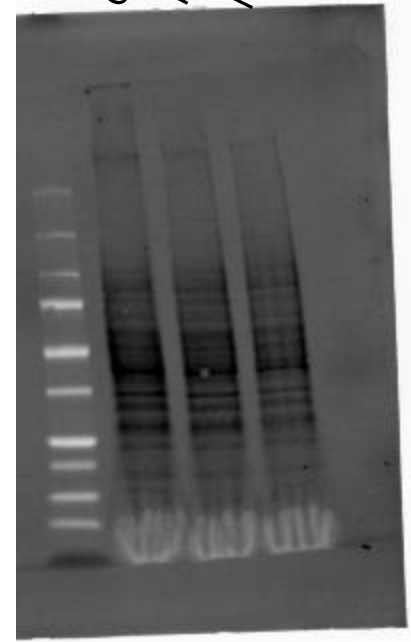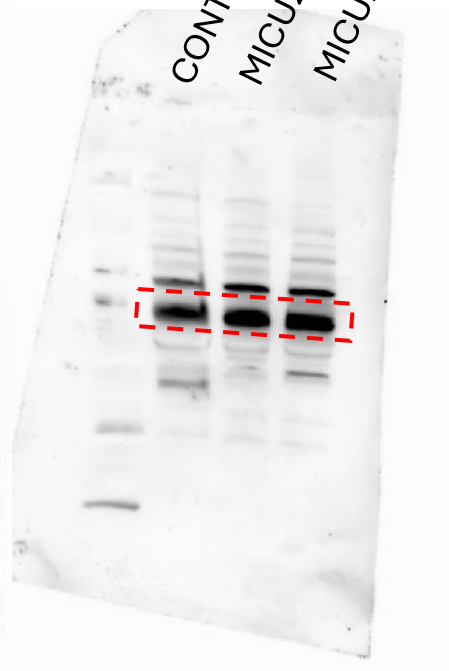

# DRP1 (≈80kDa)

01\_06\_22

CONTROL KO  
MICU2 #A KO  
MICU2 #B KO

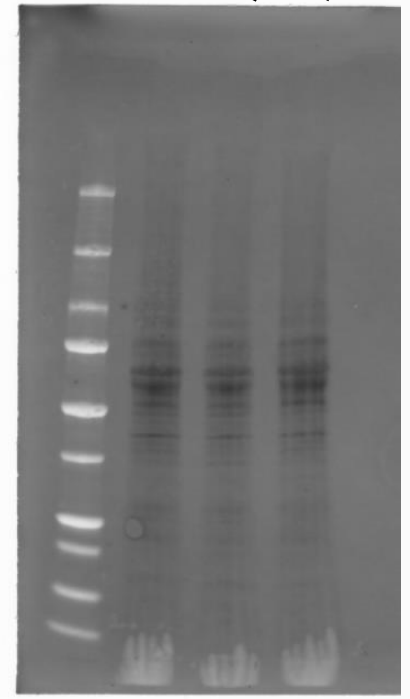

CONTROL KO  
MICU2 #A KO  
MICU2 #B KO

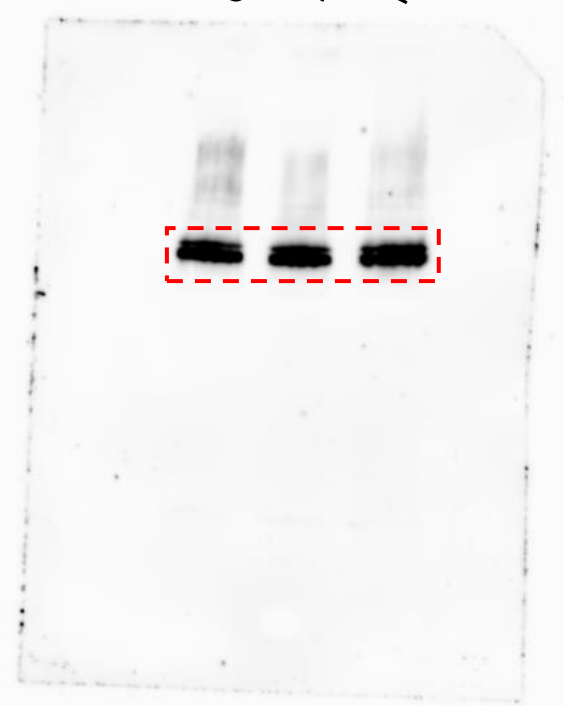

15\_06\_22

CONTROL KO  
MICU2 #A KO  
MICU2 #B KO

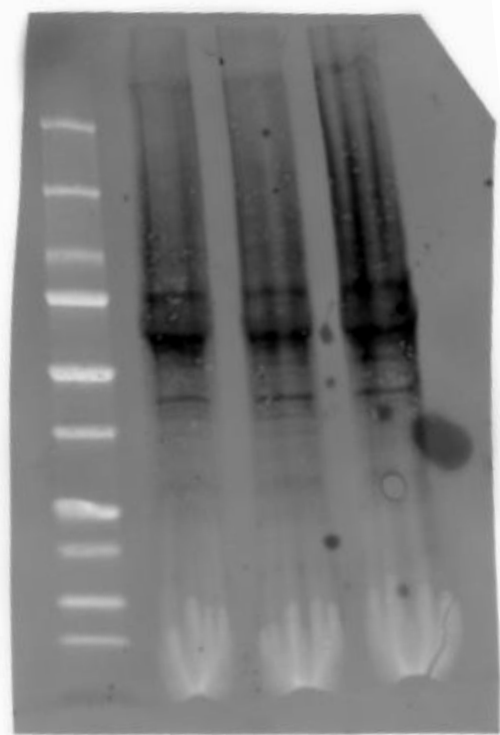

CONTROL KO  
MICU2 #A KO  
MICU2 #B KO

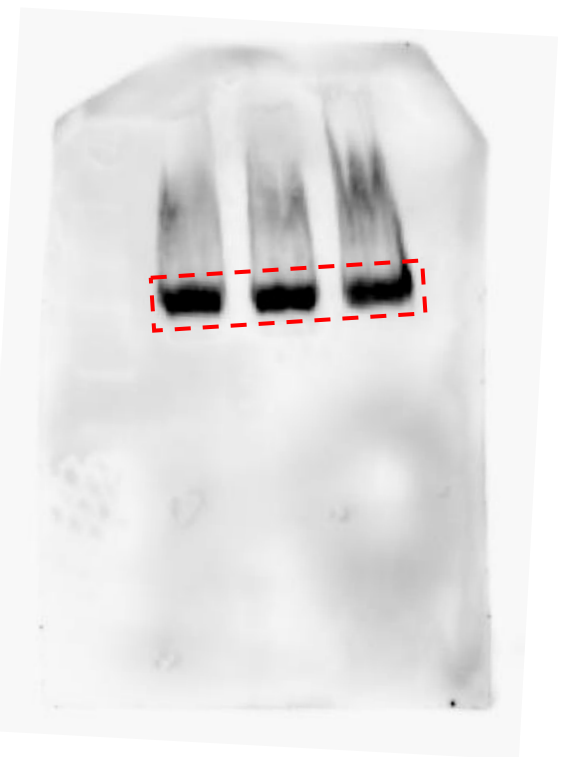

# DRP1 (≈80kDa)

01\_07\_22

CONTROL KO  
MICU2 #A KO  
MICU2 #B KO

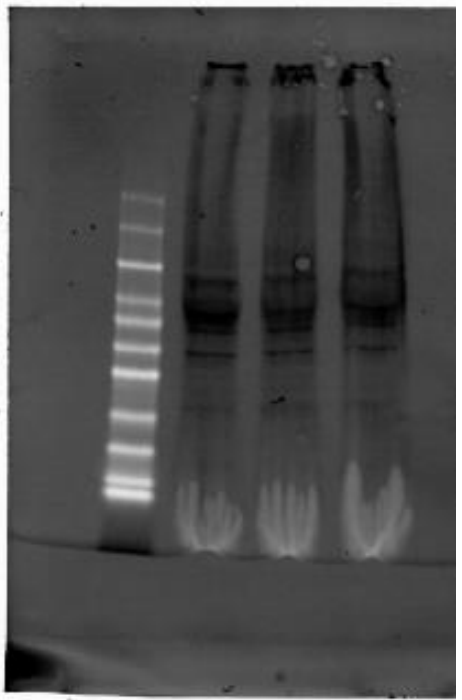

CONTROL KO  
MICU2 #A KO  
MICU2 #B KO

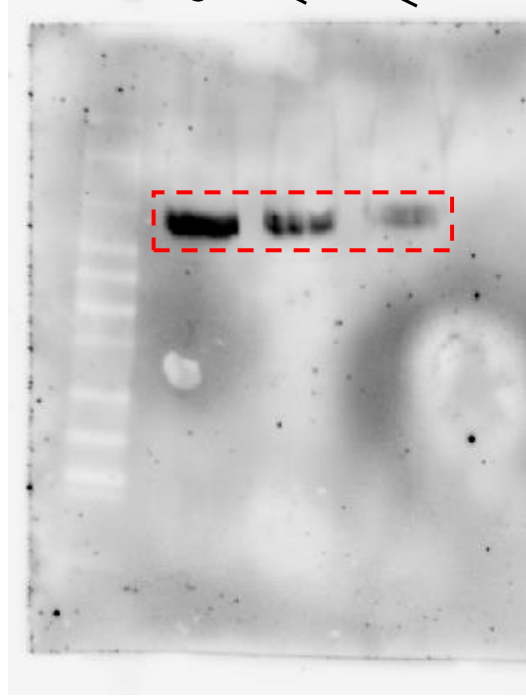

01\_07\_22

CONTROL KO  
MICU2 #A KO  
MICU2 #B KO

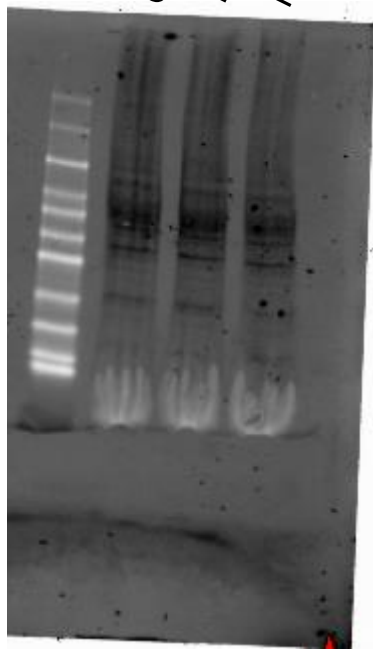

CONTROL KO  
MICU2 #A KO  
MICU2 #B KO

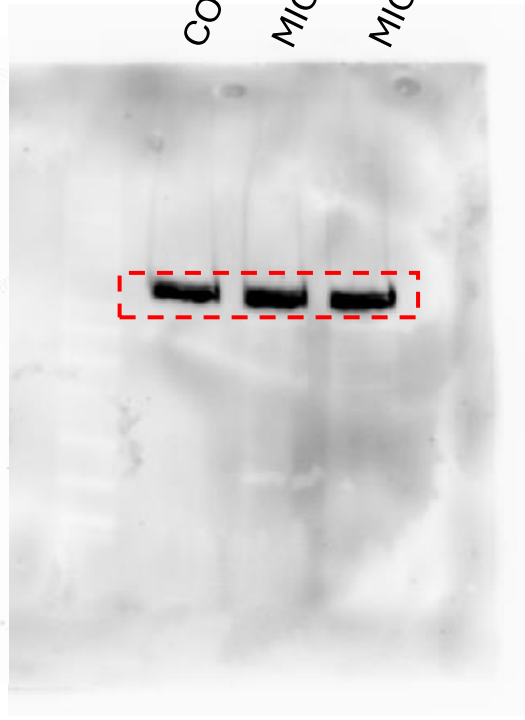

# DRP1 ( $\approx 80\text{kDa}$ )

25\_11\_22

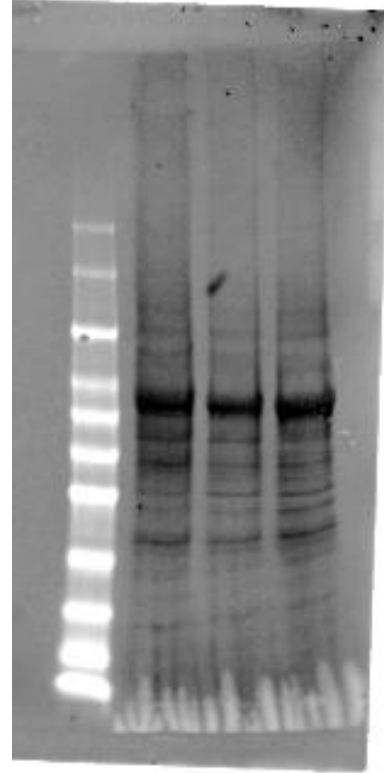

CONTROL KO  
MICU2 #A KO  
MICU2 #B KO

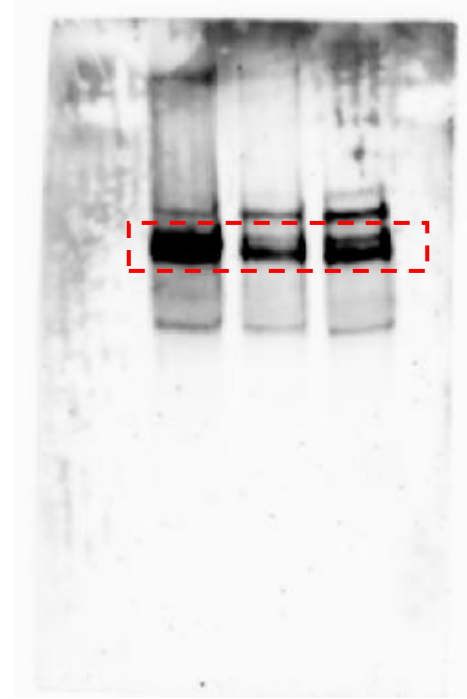

CONTROL KO  
MICU2 #A KO  
MICU2 #B KO

KO lines  
Figure 4C



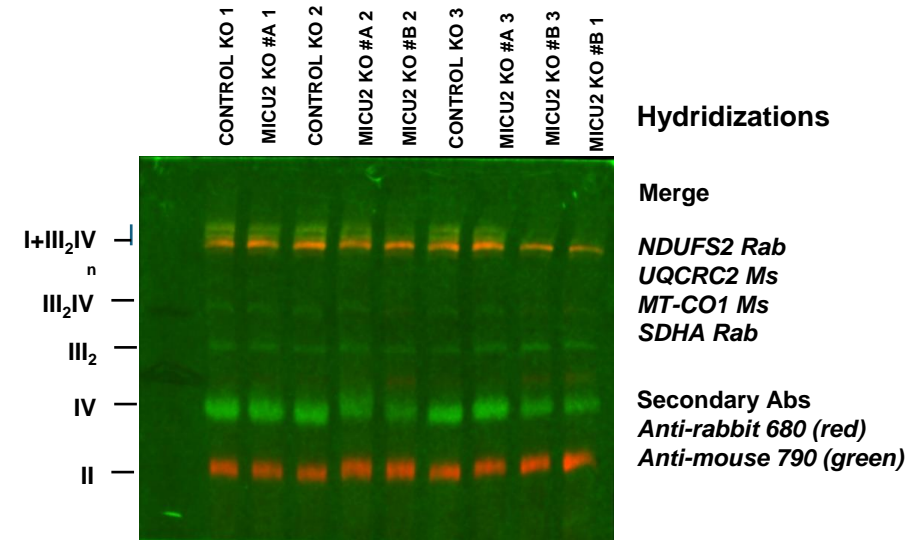

*Image forcée*

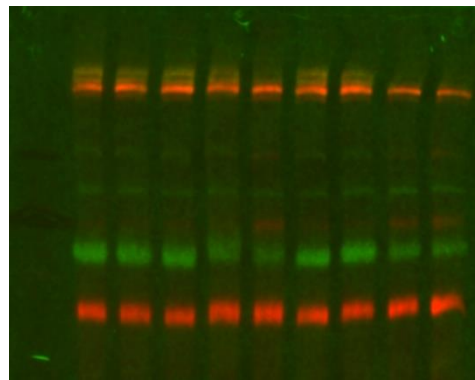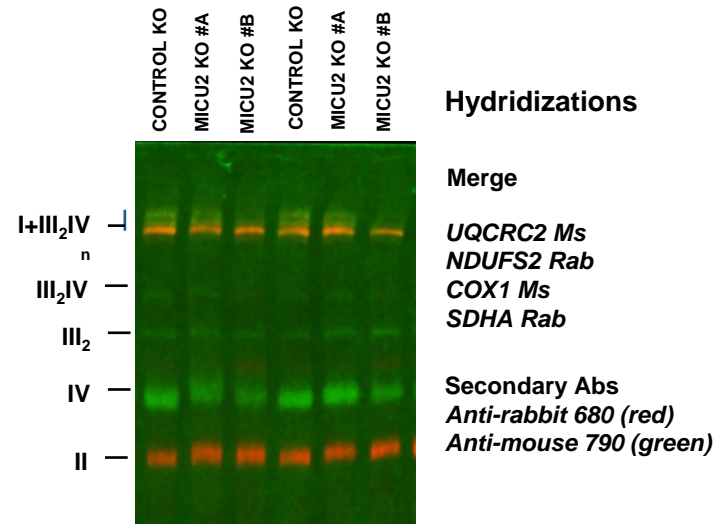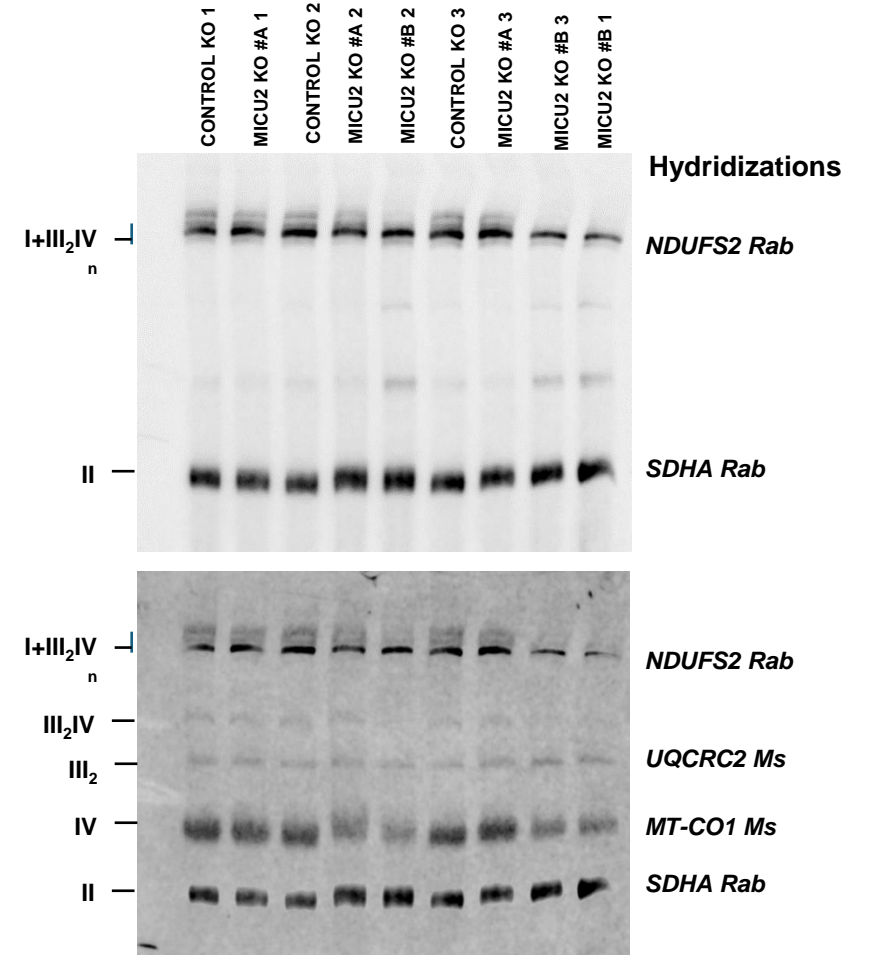

22/12/06

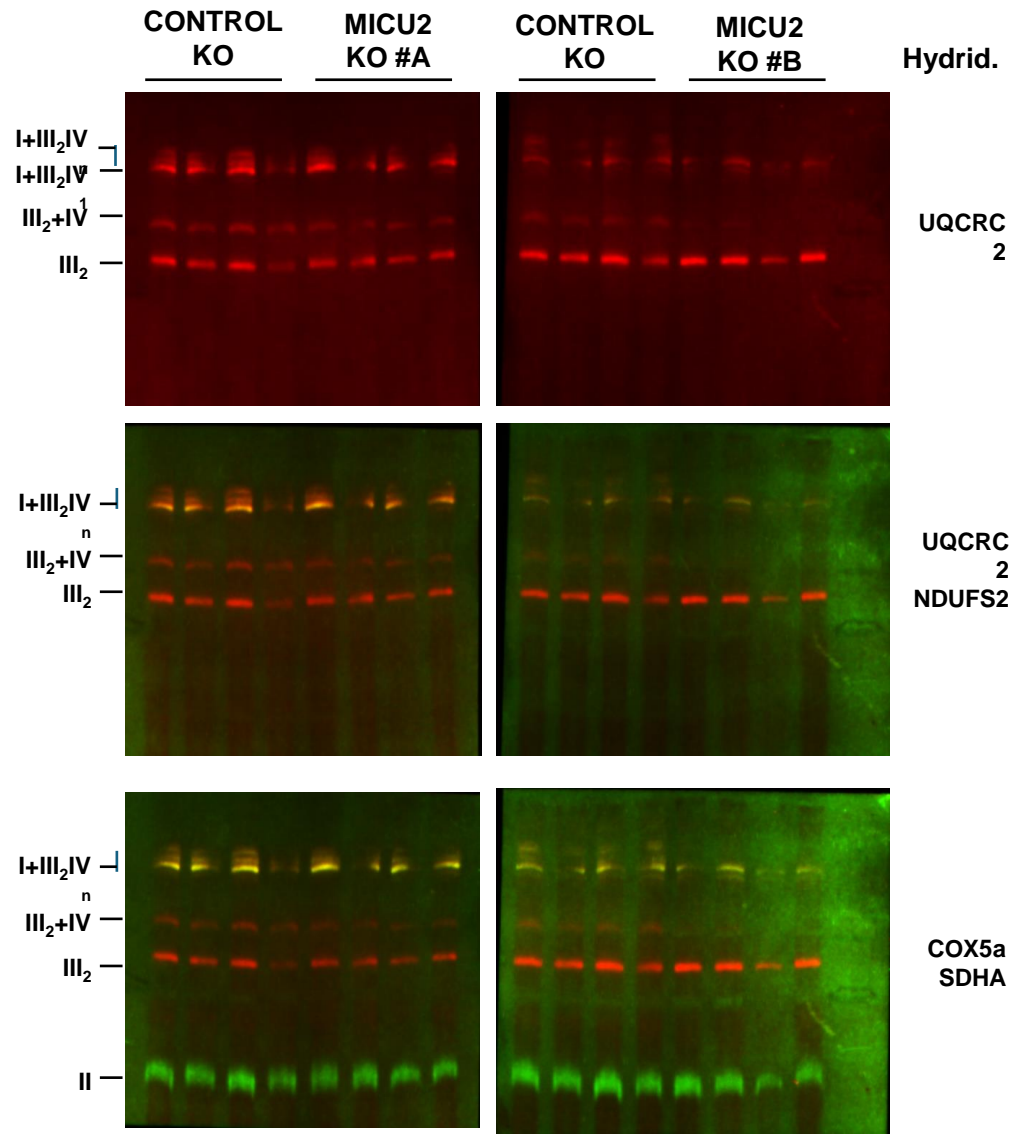

Secondaires :  
Anti-Mouse 680 (red)  
Anti-Rabbit 790 (green)

10/01/23

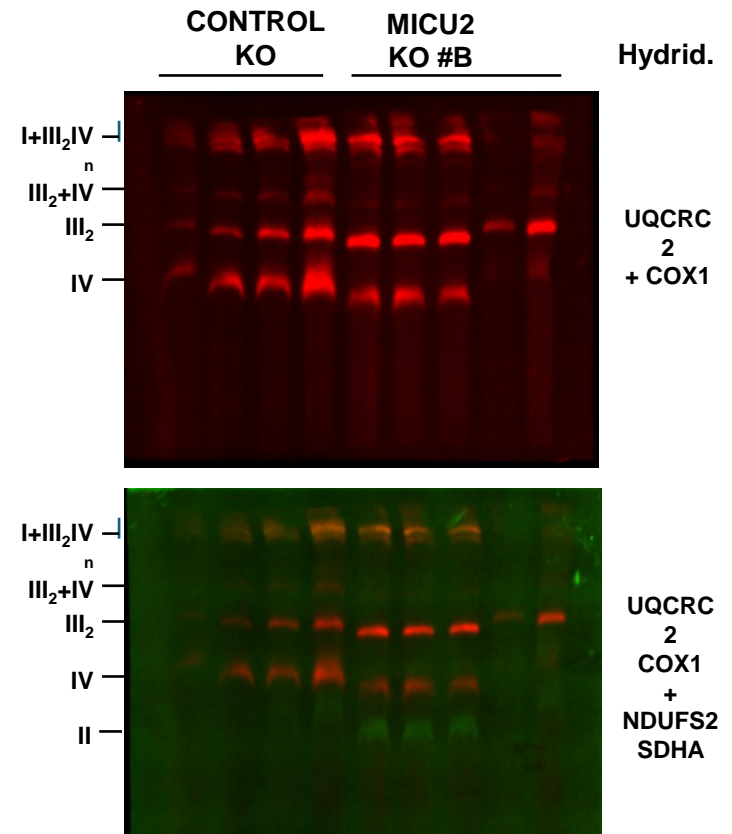

Secondaires :  
Anti-Mouse 680 (red)  
Anti-Rabbit 790 (green)

24/01/23

24/01/23

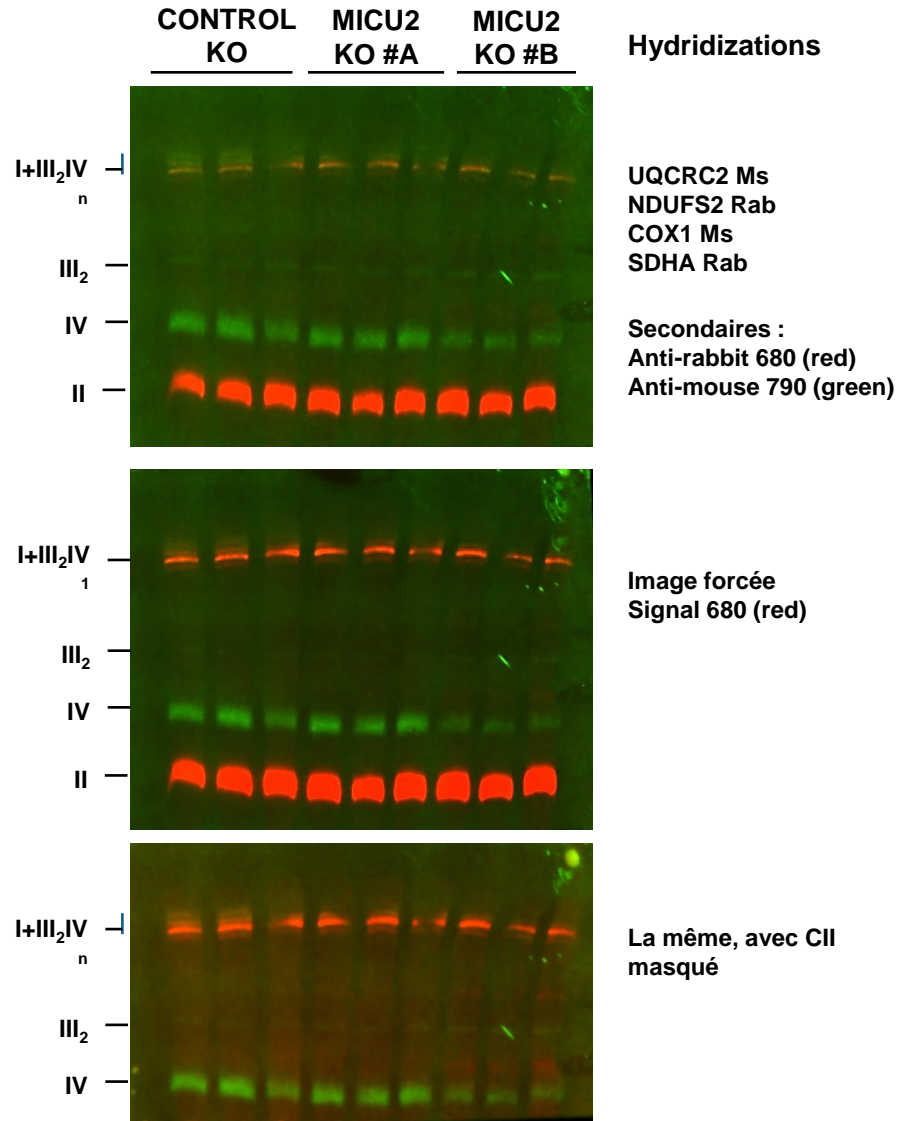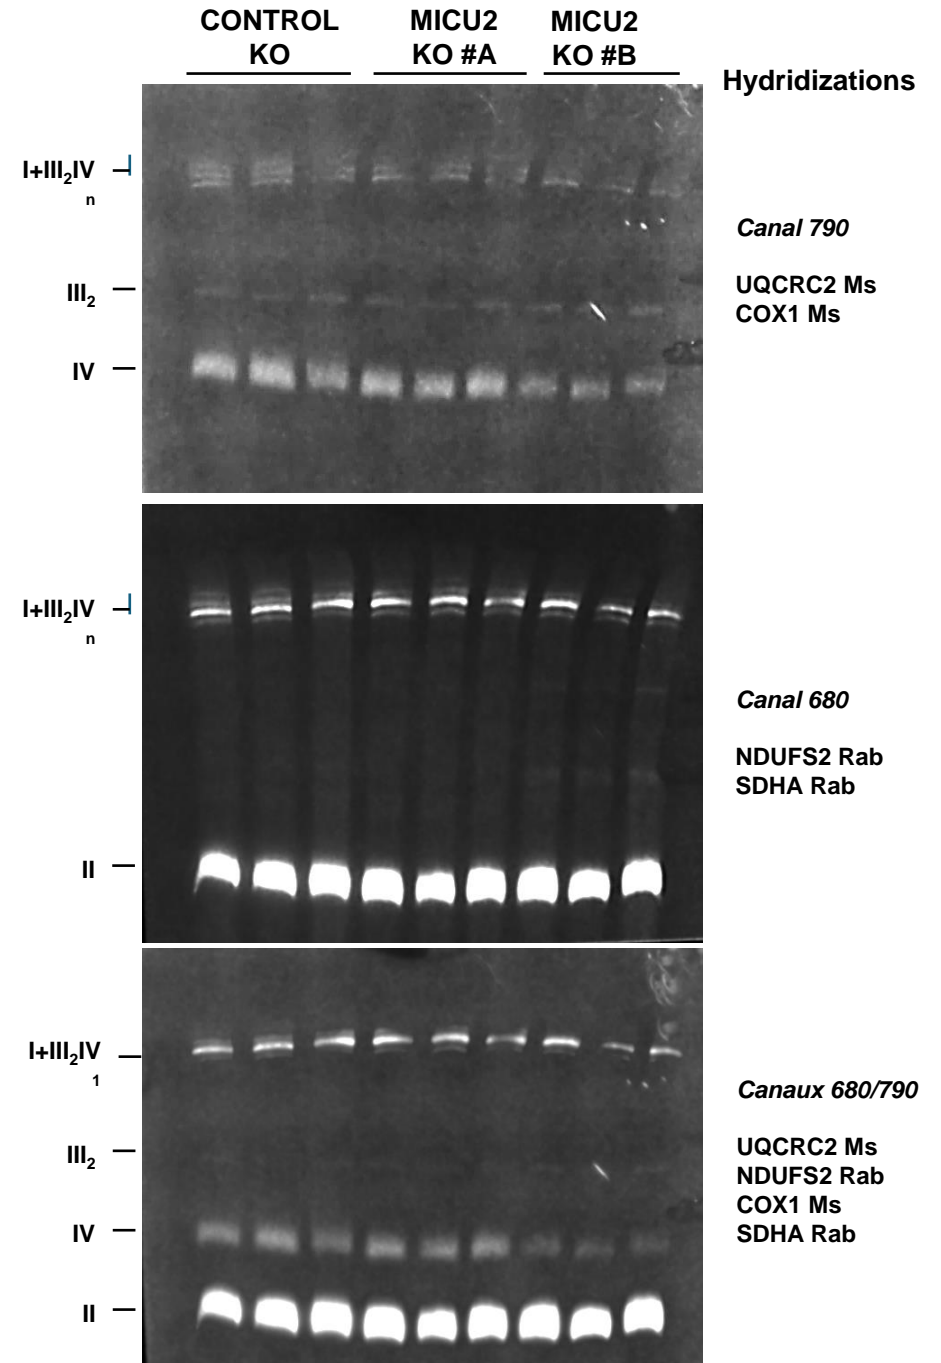

22/02/2023, Mb1

CONTROL KO 1  
 MICU2 KO #A 1  
 CONTROL KO 2  
 MICU2 KO #A 2  
 MICU2 KO #B 2  
 CONTROL KO 3  
 MICU2 KO #A 3  
 MICU2 KO #B 3  
 MICU2 KO #B 1

### Hybridizations

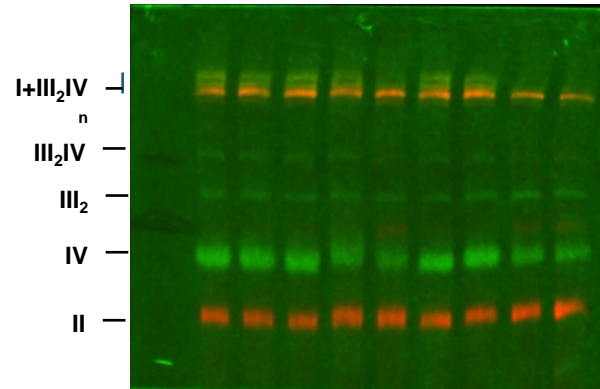

### Merge

UQCRC2 Ms  
 NDUFS2 Rab  
 COX1 Ms  
 SDHA Rab

Secondaires :  
 Anti-rabbit 680 (red)  
 Anti-mouse 790 (green)

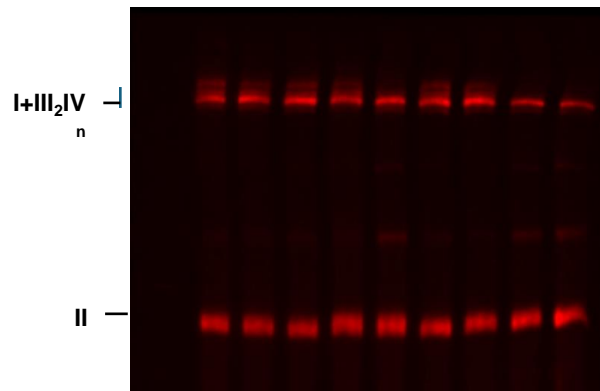

Signal 680 (red)  
 NDUFS2 Rab  
 SDHA Rab

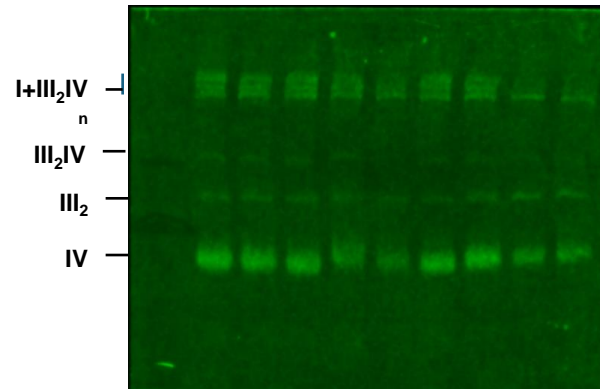

Signal 790 (Green)  
 UQCRC2 Ms  
 COX1 Ms

22/02/2023, Mb1

CONTROL KO 1  
 MICU2 KO #A 1  
 CONTROL KO 2  
 MICU2 KO #A 2  
 MICU2 KO #B 2  
 CONTROL KO 3  
 MICU2 KO #A 3  
 MICU2 KO #B 3  
 MICU2 KO #B 1

### Hybridizations

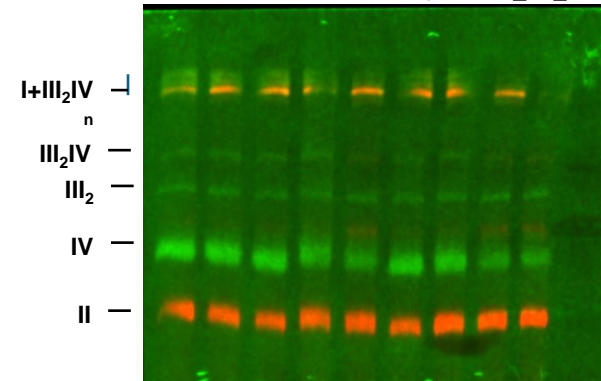

### Merge

UQCRC2 Ms  
 NDUFS2 Rab  
 COX1 Ms  
 SDHA Rab

Secondaires :  
 Anti-rabbit 680 (red)  
 Anti-mouse 790 (green)

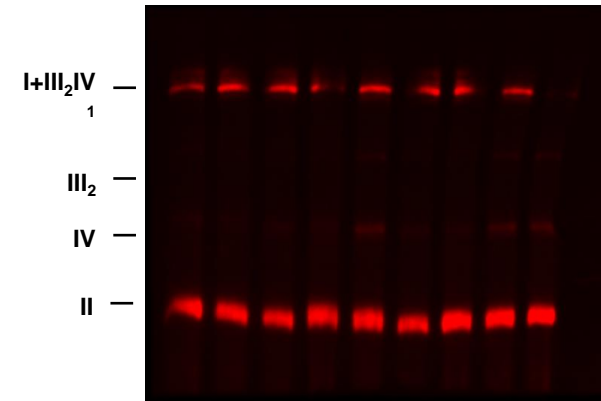

Signal 680 (red)  
 NDUFS2 Rab  
 SDHA Rab

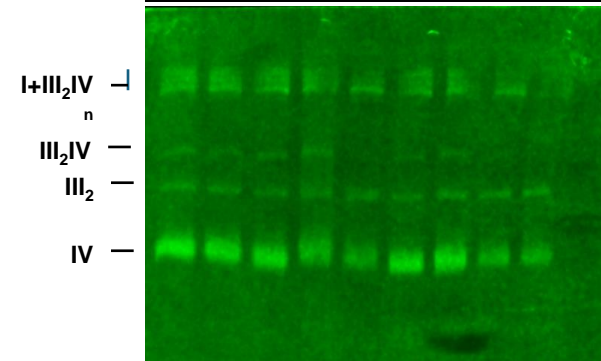

Signal 790 (Green)  
 UQCRC2 Ms  
 COX1 Ms
